# Supplementary material
Source: PubMed Central journal article supplement (PMC3567742)
Supplement: 6d313e051b0b29ccea5a7013666f544a_genetics.112.146571-2.pdf [file 6d313e051b0b29ccea5a7013666f544a_genetics.112.146571-2.pdf]

**Table S2 Trait-specific means and one standard error for individual genotypes from each of the three experimental populations (Klamath<sub>SGT</sub>, Klamath<sub>LGT</sub>, and Lake Marie<sub>SGT</sub>) for each of the three phenotypic assays.**

|            |          | Klamath <sub>SGT</sub> |          |         |          |         |
|------------|----------|------------------------|----------|---------|----------|---------|
| <b>SM</b>  | Mean 1   | SE1                    | Mean 2   | SE2     | Mean 3   | SE3     |
| B          | 1.69111  | 0.03818                | 2.002    | 0.04151 | 1.87945  | 0.05222 |
| D          | 1.964    | 0.05138                | 2.25222  | 0.06084 | 2.12817  | 0.08709 |
| F          | 1.90692  | 0.03181                | 2.26423  | 0.02587 | 2.16781  | 0.03986 |
| G          | 2.16667  | 0.03306                | 2.39375  | 0.0302  | 2.21358  | 0.02937 |
| H          | 2.04346  | 0.02675                | 2.26846  | 0.04668 | 2.23753  | 0.08957 |
| I          | 1.838    | 0.05454                | 2.16115  | 0.04423 | 2.11942  | 0.07424 |
| J          | 1.86609  | 0.03567                | 2.22     | 0.02806 | 2.0487   | 0.03303 |
| K          | 1.8731   | 0.02682                | 2.25154  | 0.01834 | 2.14786  | 0.03614 |
| M          | 1.90833  | 0.03241                | 2.18111  | 0.01957 | 2.01301  | 0.03589 |
|            |          |                        |          |         |          |         |
| <b>CL1</b> | Mean 1   | SE1                    | Mean 2   | SE2     | Mean 3   | SE3     |
| B          | 2.3125   | 0.62464                | 3.4      | 0.61579 | 1.1      | 0.38406 |
| D          | 2.71429  | 1.35742                | 5.16667  | 1.0918  | 5.11111  | 1.41421 |
| F          | 3.30769  | 0.44732                | 5.03846  | 0.62865 | 4.25     | 0.67259 |
| G          | 5.13333  | 0.7235                 | 6.08333  | 0.88256 | 5        | 0.80204 |
| H          | 2.09091  | 0.55824                | 3.92308  | 0.7679  | 2.77778  | 0.82776 |
| I          | 3.25     | 0.88585                | 2.88462  | 0.66978 | 6.66667  | 1.10554 |
| J          | 2.43478  | 0.70462                | 4.88889  | 0.7286  | 5.88889  | 0.60668 |
| K          | 5.21429  | 0.677                  | 6.19231  | 0.50277 | 4.72222  | 0.8965  |
| M          | 1.95833  | 0.66667                | 2.96296  | 0.58465 | 3.04348  | 0.71371 |
|            |          |                        |          |         |          |         |
| <b>CL2</b> | Mean 1   | SE1                    | Mean 2   | SE2     | Mean 3   | SE3     |
| B          | 3        | 1.12423                | 7.04     | 1.1878  | 1.25     | 0.44741 |
| D          |          |                        | 12.77778 | 2.0473  | 11.66667 | 2.85774 |
| F          | 11.16    | 0.86453                | 10.65385 | 1.72118 | 6.66667  | 1.47263 |
| G          | 13.93103 | 1.29137                | 17.25    | 1.38444 | 11.8     | 0.99594 |
| H          | 9.89474  | 1.44338                | 8.26923  | 1.1912  | 6.88889  | 4.36102 |
| I          | 7.6      | 1.29634                | 11.96154 | 1.69082 | 12.66667 | 2.35702 |
| J          | 7.09091  | 1.626                  | 11.25926 | 1.95059 | 12.11111 | 1.65412 |
| K          | 10.18519 | 0.77885                | 13.57692 | 1.38183 | 6.83333  | 1.23228 |
| M          | 6.45455  | 0.79722                | 14.22222 | 1.05902 | 7.30435  | 1.03884 |
|            |          |                        |          |         |          |         |
| <b>CL3</b> | Mean 1   | SE1                    | Mean 2   | SE2     | Mean 3   | SE3     |
| B          | 4.27273  | 1.04062                | 7.16     | 1.71963 | 4.05     | 1.46527 |
| D          |          |                        | 19.22222 | 3.80614 | 14.875   | 3.53273 |
| F          | 11.875   | 1.41966                | 10.84615 | 2.1916  | 3.41667  | 1.01673 |
| G          | 17.2069  | 1.92058                | 20.875   | 1.88915 | 14.25    | 1.56072 |

|   |          |         |          |         |          |         |
|---|----------|---------|----------|---------|----------|---------|
| H | 10.88889 | 1.66188 | 14.03846 | 2.31449 | 4.66667  | 2.27303 |
| I | 6.77778  | 2.84392 | 15.76923 | 2.74586 | 12.16667 | 5.82142 |
| J | 8.21053  | 1.66607 | 19.92593 | 2.24906 | 14.77778 | 1.56125 |
| K | 11.42308 | 0.9857  | 16.80769 | 1.55982 | 6.72222  | 1.64227 |
| M | 10.47059 | 1.1589  | 15.92593 | 1.77049 | 8.30435  | 1.0526  |

|            |          |         |          |         |          |         |
|------------|----------|---------|----------|---------|----------|---------|
| <b>CL4</b> | Mean 1   | SE1     | Mean 2   | SE2     | Mean 3   | SE3     |
| B          | 2.90909  | 1.06919 | 11.24    | 1.73813 | 4.45     | 1.09525 |
| D          |          |         | 20.11111 | 3.03243 | 17.375   | 4.39922 |
| F          | 13.30435 | 1.58224 | 9.53846  | 2.39419 | 3.08333  | 1.08536 |
| G          | 18.42857 | 1.85623 | 22.20833 | 2.7821  | 14.65    | 1.87697 |
| H          | 11.27778 | 1.44161 | 16.30769 | 2.09404 | 10.11111 | 5.69763 |
| I          | 9.625    | 3.47906 | 15.92308 | 3.68236 | 14       | 5.60753 |
| J          | 12.57895 | 1.63849 | 23.03704 | 2.74621 | 17.88889 | 1.81621 |
| K          | 12.95833 | 0.80592 | 20.03846 | 1.83246 | 12.26667 | 2.32578 |
| M          | 12.41176 | 1.13025 | 15.96296 | 2.00385 | 11.95238 | 1.49317 |

|           |         |         |         |         |         |         |
|-----------|---------|---------|---------|---------|---------|---------|
| <b>AM</b> | Mean 1  | SE1     | Mean 2  | SE2     | Mean 3  | SE3     |
| B         | 7.72305 | 0.68432 | 6.0468  | 0.27039 | 6.58142 | 0.38831 |
| D         | 7.508   | 0.85732 | 6.52889 | 0.39209 | 7.36205 | 0.74563 |
| F         | 5.94724 | 0.2059  | 5.95731 | 0.23634 | 6.47563 | 0.17033 |
| G         | 6.38018 | 0.25681 | 6.23667 | 0.19481 | 6.72361 | 0.26628 |
| H         | 6.52181 | 0.39364 | 6.62192 | 0.28672 | 7.4095  | 1.16907 |
| I         | 6.86785 | 0.42673 | 5.97577 | 0.24111 | 6.83149 | 0.51572 |
| J         | 6.55759 | 0.34808 | 6.68259 | 0.56116 | 6.93879 | 0.33322 |
| K         | 6.53339 | 0.14558 | 6.12115 | 0.16449 | 6.83465 | 0.39046 |
| M         | 6.75191 | 0.4088  | 5.89111 | 0.19927 | 6.46791 | 0.24094 |

---

Klamath<sub>LGT</sub>

---

|           |         |         |         |         |         |         |
|-----------|---------|---------|---------|---------|---------|---------|
| <b>SM</b> | Mean 1  | SE1     | Mean 2  | SE2     | Mean 3  | SE3     |
| D         | 1.98714 | 0.03649 | 2.29962 | 0.02321 | 2.14567 | 0.05293 |
| F         | 1.96633 | 0.02622 | 2.22759 | 0.03078 | 2.04506 | 0.03888 |
| G         | 2.05852 | 0.03268 | 2.40533 | 0.02522 | 2.14567 | 0.04566 |
| H         | 2.01889 | 0.03452 | 2.30095 | 0.02857 | 2.14567 | 0.07557 |
| J         | 1.84786 | 0.03072 | 2.23067 | 0.02247 | 2.14661 | 0.03761 |
| M         | 1.84174 | 0.03283 | 2.18214 | 0.0244  | 2.05927 | 0.05814 |

|            |         |         |         |         |         |         |
|------------|---------|---------|---------|---------|---------|---------|
| <b>CL1</b> | Mean 1  | SE1     | Mean 2  | SE2     | Mean 3  | SE3     |
| D          | 2       | 0.78707 | 4.23077 | 0.72815 | 4.54545 | 0.84092 |
| F          | 3.03333 | 0.49814 | 4.41379 | 0.50161 | 2.63158 | 0.53593 |
| G          | 4.2963  | 0.71308 | 7.66667 | 1.51897 | 4.31579 | 0.64877 |

|            |          |         |          |         |          |         |
|------------|----------|---------|----------|---------|----------|---------|
| H          | 2.37037  | 0.43243 | 3.90909  | 0.61464 | 2.23077  | 0.61592 |
| J          | 3.21429  | 0.84537 | 7.43333  | 0.49566 | 7        | 1.11665 |
| M          | 2.90476  | 0.7962  | 4.03571  | 0.63036 | 1.66667  | 0.97068 |
| <b>CL2</b> | Mean 1   | SE1     | Mean 2   | SE2     | Mean 3   | SE3     |
| D          | 6.5      | 1.82312 | 14.42308 | 2.04383 | 10.36364 | 2.2753  |
| F          | 11.34483 | 1.10771 | 12.17241 | 1.23149 | 5.31579  | 1.0341  |
| G          | 12.22222 | 1.28425 | 18.33333 | 1.58785 | 11.36842 | 1.10417 |
| H          | 8.125    | 0.90669 | 6.54545  | 1.33452 | 4        | 1.50321 |
| J          | 7.39286  | 1.14677 | 18.33333 | 1.16063 | 14       | 1.87248 |
| M          | 7.85714  | 1.07067 | 13.71429 | 0.78201 | 8.05882  | 0.85643 |
| <b>CL3</b> | Mean 1   | SE1     | Mean 2   | SE2     | Mean 3   | SE3     |
| D          | 10.22222 | 1.94414 | 19.03846 | 2.08811 | 11.27273 | 2.92499 |
| F          | 13.2963  | 0.84209 | 10.13793 | 3.07336 | 4.68421  | 0.90418 |
| G          | 16.22222 | 1.51891 | 21.36667 | 1.5178  | 12.33333 | 1.38919 |
| H          | 11.58333 | 0.95769 | 9.95455  | 2.13591 | 4.38462  | 1.17829 |
| J          | 8.96296  | 1.74081 | 20.86667 | 1.22189 | 17.35    | 1.98078 |
| M          | 10.31579 | 0.61281 | 16.14286 | 1.52694 | 11.82353 | 1.26227 |
| <b>CL4</b> | Mean 1   | SE1     | Mean 2   | SE2     | Mean 3   | SE3     |
| D          | 8.28571  | 5.62028 | 22.80769 | 2.63607 | 13.6     | 3.78871 |
| F          | 14.66667 | 1.86017 | 13.44828 | 3.36754 | 4.55556  | 1.8407  |
| G          | 19.14815 | 1.26808 | 22.93333 | 2.41668 | 12.66667 | 1.83317 |
| H          | 10.80952 | 1.79025 | 14.27273 | 3.74578 | 3.84615  | 2.03369 |
| J          | 13.51852 | 1.67346 | 28.73333 | 2.64738 | 19.85    | 2.21464 |
| M          | 8.5      | 1.49642 | 16.92857 | 1.99864 | 12.52941 | 3.21636 |
| <b>AM</b>  | Mean 1   | SE1     | Mean 2   | SE2     | Mean 3   | SE3     |
| D          | 7.54688  | 0.61291 | 6.17923  | 0.17816 | 6.65861  | 0.39264 |
| F          | 6.52135  | 0.29006 | 5.87034  | 0.21236 | 6.82576  | 0.52245 |
| G          | 6.27675  | 0.2578  | 5.97133  | 0.16632 | 6.78611  | 0.45291 |
| H          | 6.46136  | 0.31493 | 6.38091  | 0.23506 | 7.01283  | 0.64546 |
| J          | 6.43364  | 0.30622 | 6.07633  | 0.1188  | 6.74281  | 0.23265 |
| M          | 6.643    | 0.26849 | 5.99571  | 0.12323 | 6.98517  | 0.28321 |

---

Marie

---

|           |         |         |         |         |         |         |
|-----------|---------|---------|---------|---------|---------|---------|
| <b>SM</b> | Mean 1  | SE1     | Mean 2  | SE2     | Mean 3  | SE3     |
| B         | 1.75833 | 0.03236 | 1.885   | 0.0206  |         |         |
| F         | 1.82481 | 0.02514 | 1.90091 | 0.05339 | 1.87289 | 0.02986 |
| H         | 1.75933 | 0.03612 | 1.83353 | 0.03047 |         |         |
| I         | 1.82714 | 0.04104 | 1.80889 | 0.0358  |         |         |

|            |          |         |          |         |         |         |
|------------|----------|---------|----------|---------|---------|---------|
| K          | 1.84704  | 0.02724 | 1.99037  | 0.02055 | 1.92828 | 0.0273  |
| L          | 1.98522  | 0.02253 | 2.04842  | 0.0637  |         |         |
| M          | 1.82875  | 0.03742 | 1.8725   | 0.02862 |         |         |
| <b>CL1</b> | Mean 1   | SE1     | Mean 2   | SE2     | Mean 3  | SE3     |
| B          | 2.36842  | 1.00236 | 0.35714  | 0.33369 |         |         |
| F          | 5.51852  | 0.45134 | 4.14286  | 1.72773 | 2.07143 | 0.67234 |
| H          | 2.46667  | 0.5529  | 1.11765  | 0.52723 |         |         |
| I          | 3.6      | 1.09929 | 0.6      | 0.48553 |         |         |
| K          | 4.37037  | 0.3849  | 4.7037   | 0.4598  | 3.43478 | 0.58994 |
| L          | 5.08333  | 0.81022 | 2.89474  | 1.33074 |         |         |
| M          | 3.125    | 0.83553 | 0.92308  | 0.39099 |         |         |
| <b>CL2</b> | Mean 1   | SE1     | Mean 2   | SE2     | Mean 3  | SE3     |
| B          | 5.52632  | 0.99673 | 0.57143  | 0.22527 |         |         |
| F          | 13.22222 | 1.21144 | 6.57143  | 3.20123 | 5.92857 | 1.39654 |
| H          | 3.6      | 0.89785 | 1.35294  | 0.42462 |         |         |
| I          | 7.93333  | 1.99712 | 2.2      | 1.2333  |         |         |
| K          | 11.96296 | 1.29159 | 12.07407 | 1.33824 | 8.54545 | 1.27277 |
| L          | 11.625   | 1.47148 | 7.89474  | 1.49436 |         |         |
| M          | 6.25     | 0.85928 | 1.30769  | 0.81009 |         |         |
| <b>CL3</b> | Mean 1   | SE1     | Mean 2   | SE2     | Mean 3  | SE3     |
| B          | 5.42105  | 1.10972 | 1.42857  | 0.69607 |         |         |
| F          | 12.59259 | 1.55431 | 3.85714  | 2.01914 | 7.28571 | 1.01835 |
| H          | 4.06667  | 0.88481 | 1.35294  | 0.45659 |         |         |
| I          | 8.86667  | 2.73351 | 3.1      | 1.25681 |         |         |
| K          | 11.77778 | 1.30037 | 14.25926 | 1.66539 | 8.18182 | 1.63249 |
| L          | 10.41667 | 1.92982 | 10.15789 | 3.62889 |         |         |
| M          | 8.5      | 1.34725 | 1.38462  | 0.64659 |         |         |
| <b>CL4</b> | Mean 1   | SE1     | Mean 2   | SE2     | Mean 3  | SE3     |
| B          | 4.78947  | 1.20652 | 1.28571  | 0.62703 |         |         |
| F          | 14.62963 | 1.56889 | 5.35714  | 2.07485 | 5.35714 | 1.46986 |
| H          | 3.6      | 1.12838 | 0.70588  | 0.38315 |         |         |
| I          | 7.26667  | 2.62354 | 3.5      | 1.88542 |         |         |
| K          | 15.44444 | 1.81525 | 17.33333 | 1.80662 | 8.5     | 1.85029 |
| L          | 9.58333  | 1.82357 | 7.31579  | 2.89184 |         |         |
| M          | 7.625    | 2.18111 | 1.84615  | 1.27127 |         |         |
| <b>AM</b>  | Mean 1   | SE1     | Mean 2   | SE2     | Mean 3  | SE3     |
| B          | 6.845    | 0.38082 | 6.55     | 0.79418 |         |         |
| F          | 6.48538  | 0.23584 | 6.47     | 0.38744 | 6.71091 | 0.39535 |

|   |         |         |         |         |         |         |
|---|---------|---------|---------|---------|---------|---------|
| H | 6.78667 | 0.84759 | 6.64765 | 0.52907 |         |         |
| I | 6.78286 | 0.35139 | 6.54111 | 0.33587 |         |         |
| K | 5.52148 | 0.91218 | 6.31259 | 0.14336 | 6.55009 | 0.11752 |
| L | 6.36682 | 0.20068 | 6.56737 | 0.34794 |         |         |
| M | 6.69    | 0.29772 | 6.6325  | 0.56854 |         |         |

---
