# Supplementary material
Source: PubMed Central journal article supplement (PMC3567742)
Supplement: 16eba56fa0e2c22ef53386be22e47a43_genetics.112.146571-3.pdf [file 16eba56fa0e2c22ef53386be22e47a43_genetics.112.146571-3.pdf]

**Table S4 Trait-specific estimates of  $\Delta V$  (VAR) and  $\Delta M$  (MEAN) for individual genotypes from each of the three experimental populations (Klamath<sub>SGT</sub>, Klamath<sub>LGT</sub>, and Lake Marie<sub>SGT</sub>).**

| Population             | Genotype | SM <sub>VAR</sub> | SM <sub>MEAN</sub> | CL1 <sub>VAR</sub> | CL1 <sub>MEAN</sub> | CL2 <sub>VAR</sub> | CL2 <sub>MEAN</sub> | CL3 <sub>VAR</sub> | CL3 <sub>MEAN</sub> | CL4 <sub>VAR</sub> | CL4 <sub>MEAN</sub> | AM <sub>VAR</sub> | AM <sub>MEAN</sub> |
|------------------------|----------|-------------------|--------------------|--------------------|---------------------|--------------------|---------------------|--------------------|---------------------|--------------------|---------------------|-------------------|--------------------|
| Marie                  | B        | 0.00000           | 0.00870            | 0.00790            | -0.13400            | 0.00290            | -0.33100            | 0.05230            | -0.26600            | 0.02640            | -0.23300            | 0.01140           | -0.02000           |
|                        | F        | 0.00005           | 0.00110            | 0.00021            | -0.08020            | 0.00003            | -0.16700            | 0.00010            | -0.09690            | 0.04900            | -0.20250            | 0.00790           | 0.00500            |
|                        | H        | 0.00014           | 0.00440            | 0.00540            | -0.08400            | 0.00190            | -0.14100            | 0.01350            | -0.17000            | 0.02210            | -0.18100            | 0.02180           | -0.00800           |
|                        | I        | 0.00002           | -0.00130           | 0.00304            | -0.18800            | 0.07400            | -0.35800            | 0.13800            | -0.36100            | 0.09700            | -0.23600            | 0.00658           | -0.01500           |
|                        | K        | 0.00003           | 0.00120            | 0.00940            | -0.01990            | 0.03760            | -0.07580            | 0.20250            | -0.08170            | 0.04060            | -0.15950            | 0.00009           | 0.01290            |
|                        | L        | 0.00030           | 0.00380            | 0.23700            | -0.13700            | 0.31900            | -0.23400            | 1.29000            | -0.01630            | 0.47800            | -0.14100            | 0.00570           | 0.01250            |
|                        | M        | 0.00003           | 0.00270            | 0.03600            | -0.14700            | 0.05210            | -0.32900            | 0.03700            | -0.47500            | 0.40300            | -0.38500            | 0.00820           | -0.00400           |
| Klamath <sub>SGT</sub> | B        | 0.00008           | 0.00300            | 0.00400            | -0.03600            | 0.00200            | -0.07300            | 0.12800            | -0.01400            | 0.01050            | -0.00037            | 0.00000           | -0.00700           |
|                        | D        | 0.00020           | 0.00300            | 0.01900            | 0.03800             | 0.20000            | -0.03200            | 0.50900            | -0.12400            | 0.16300            | -0.07700            | 0.00026           | 0.00500            |
|                        | F        | 0.00004           | 0.00400            | 0.00700            | 0.01500             | 0.02400            | -0.08500            | 0.03400            | -0.16300            | 0.10700            | -0.18700            | 0.00006           | 0.01060            |
|                        | G        | 0.00001           | -0.00010           | 0.04200            | -0.00600            | 0.00000            | -0.06100            | 0.09700            | -0.08100            | 0.01800            | -0.08800            | 0.00180           | 0.00780            |
|                        | H        | 0.00010           | 0.00500            | 0.00100            | 0.01100             | 0.27100            | -0.06500            | 0.50200            | -0.00400            | 0.04780            | -0.10900            | 0.01690           | 0.01790            |
|                        | I        | 0.00012           | 0.00500            | 0.00600            | 0.07900             | 0.07900            | 0.10600             | 0.32100            | 0.11200             | 0.42300            | 0.08300             | 0.00430           | 0.00400            |
|                        | J        | 0.00008           | 0.00100            | 0.01100            | 0.05800             | 0.30200            | 0.08400             | 0.20200            | 0.08400             | 0.12900            | 0.07300             | 0.00086           | 0.00720            |
|                        | K        |                   | 0.00400            | 0.02500            | -0.01400            | 0.03200            | -0.07300            | 0.08500            | -0.10200            | 0.12500            | -0.00300            | 0.00470           | 0.00510            |
| M                      | 0.00002  | 0.00200           | 0.03400            | 0.01800            | 0.01700             | 0.00300            | 0.01270             | -0.06300           | 0.02120             | -0.01600           | 0.00120             | 0.00180           |                    |
| Klamath <sub>LGT</sub> | D        | 0.00004           | 0.00900            | 0.00000            | 0.12900             | 0.23500            | 0.21500             | 0.27000            | 0.11400             | 0.07800            | 0.15700             | 0.00700           | -0.03200           |
|                        | F        | 0.00014           | 0.00700            | 0.01700            | 0.18200             | 0.03170            | -0.48200            | 0.17100            | -0.66400            | 0.75700            | -0.78700            | 0.01300           | 0.01100            |
|                        | G        | 0.00030           | 0.01030            | 0.13000            | -0.01200            | 0.16200            | -0.10700            |                    | -0.34100            | 0.48600            | -0.47200            | 0.01100           | 0.03100            |
|                        | H        | 0.00020           | 0.01500            | 0.02100            | -0.00700            | 0.02100            | -0.29800            | 0.01500            | -0.51600            | 0.73600            | -0.51200            | 0.01700           | 0.03500            |
|                        | J        |                   | 0.02000            | 0.07000            | 0.40700             | 0.25600            | 0.45900             | 0.58100            | 0.48500             | 0.11800            | 0.37300             | 0.00320           | 0.05000            |
|                        | M        | 0.00010           | 0.01300            | 0.06300            | -0.07000            | 0.03500            | -0.05600            | 0.10700            | 0.09300             | 0.72800            | 0.24500             |                   | 0.02500            |
