# Supplementary material
Source: PubMed Central journal article supplement (PMC3567742)
Supplement: 70916bd7014bf0dcddb6a87644e70e02_genetics.112.146571-1.pdf [file 70916bd7014bf0dcddb6a87644e70e02_genetics.112.146571-1.pdf]

**Table S1 Trait-specific means and two standard errors for control genotypes from each of the two populations (Klamath and Marie) for each of the three phenotypic assays.**

| Klamath    |        |       |        |       |        |       |
|------------|--------|-------|--------|-------|--------|-------|
| <b>SM</b>  | Mean 1 | 2SE1  | Mean 2 | 2SE2  | Mean 3 | 2SE3  |
| G          | 2.23   | 0.06  | 2.42   | 0.06  | 2.25   | 0.05  |
| I          | 2.05   | 0.08  | 2.36   | 0.04  | 2.15   | 0.06  |
| K          | 1.83   | 0.06  | 2.32   | 0.06  | 1.95   | 0.06  |
| <b>CL1</b> | Mean 1 | 2SE1  | Mean 2 | 2SE2  | Mean 3 | 2SE3  |
| G          | 3.79   | 1.58  | 6.53   | 1.16  | 4.16   | 0.88  |
| I          | 2.92   | 1.42  | 3.47   | 1.06  | 1.73   | 0.8   |
| K          | 3.5    | 1.26  | 6.61   | 1.52  | 0.73   | 0.54  |
| <b>CL2</b> | Mean 1 | 2SE1  | Mean 2 | 2SE2  | Mean 3 | 2SE3  |
| G          | 7.46   | 3.42  | 19     | 2.44  | 10.23  | 1.72  |
| I          | 6.83   | 1.76  | 8.87   | 2.46  | 4.79   | 1.52  |
| K          | 8.76   | 1.88  | 13.67  | 2.12  | 1.33   | 0.98  |
| <b>CL3</b> | Mean 1 | 2SE1  | Mean 2 | 2SE2  | Mean 3 | 2SE3  |
| G          | 13.27  | 4.84  | 20.3   | 2.74  | 10.43  | 1.86  |
| I          | 8.33   | 2.68  | 8.07   | 2.54  | 5.51   | 1.98  |
| K          | 10.61  | 3.24  | 18.11  | 2.78  | 2.79   | 1.22  |
| <b>CL4</b> | Mean 1 | 2SE1  | Mean 2 | 2SE2  | Mean 3 | 2SE3  |
| G          | 15.9   | 4.38  | 24     | 4.48  | 11.17  | 2.72  |
| I          | 8.92   | 3.72  | 11.63  | 3.76  | 7.51   | 2.12  |
| K          | 13.46  | 2.5   | 21.72  | 3.58  | 2.48   | 1.58  |
| <b>AM</b>  | Mean 1 | 2SE1  | Mean 2 | 2SE2  | Mean 3 | 2SE3  |
| G          | 6.07   | 0.66  | 6.17   | 0.42  | 6.91   | 0.4   |
| I          | 6.76   | 0.6   | 6.06   | 0.3   | 6.65   | 0.46  |
| K          | 6.02   | 0.5   | 6.34   | 0.5   | 6.6    | 0.26  |
| Marie      |        |       |        |       |        |       |
| <b>SM</b>  | Mean 1 | 2SE1  | Mean 2 | 2SE2  | Mean 3 | 2SE3  |
| B          | 1.71   | 0.104 | 1.8    | 0.056 | 1.83   | 0.084 |
| K          | 1.89   | 0.076 | 1.93   | 0.056 | 1.9    | 0.108 |
| <b>CL1</b> | Mean 1 | 2SE1  | Mean 2 | 2SE2  | Mean 3 | 2SE3  |
| B          | 3.54   | 1.476 | 0.87   | 0.92  | 1.1    | 1.26  |

|            |        |       |        |      |        |       |
|------------|--------|-------|--------|------|--------|-------|
| K          | 4.93   | 1.48  | 4.7    | 2.12 | 1.39   | 0.96  |
| <b>CL2</b> | Mean 1 | 2SE1  | Mean 2 | 2SE2 | Mean 3 | 2SE3  |
| B          | 4.46   | 2.424 | 1.95   | 1.8  | 3.5    | 3     |
| K          | 11.71  | 4.76  | 11.23  | 4.24 | 4.96   | 3.2   |
| <b>CL3</b> | Mean 1 | 2SE1  | Mean 2 | 2SE2 | Mean 3 | 2SE3  |
| B          | 6.92   | 3.152 | 1.86   | 1.92 | 4.13   | 2.96  |
| K          | 16.93  | 5.24  | 12.7   | 5.36 | 6.46   | 3.8   |
| <b>CL4</b> | Mean 1 | 2SE1  | Mean 2 | 2SE2 | Mean 3 | 2SE3  |
| B          | 7.15   | 3.84  | 1.84   | 1.48 | 7.33   | 4.48  |
| K          | 16.21  | 6.8   | 11.31  | 5.6  | 6.53   | 3.88  |
| <b>AM</b>  | Mean 1 | 2SE1  | Mean 2 | 2SE2 | Mean 3 | 2SE3  |
| B          | 6.66   | 1.572 | 6.35   | 0.56 | 6.91   | 0.576 |
| K          | 6.13   | 0.96  | 6.46   | 0.76 | 6.92   | 1.16  |

---

**Table S2 Trait-specific means and one standard error for individual genotypes from each of the three experimental populations (Klamath<sub>SGT</sub>, Klamath<sub>LGT</sub>, and Lake Marie<sub>SGT</sub>) for each of the three phenotypic assays.**

|            |          | Klamath <sub>SGT</sub> |          |         |          |         |
|------------|----------|------------------------|----------|---------|----------|---------|
| <b>SM</b>  | Mean 1   | SE1                    | Mean 2   | SE2     | Mean 3   | SE3     |
| B          | 1.69111  | 0.03818                | 2.002    | 0.04151 | 1.87945  | 0.05222 |
| D          | 1.964    | 0.05138                | 2.25222  | 0.06084 | 2.12817  | 0.08709 |
| F          | 1.90692  | 0.03181                | 2.26423  | 0.02587 | 2.16781  | 0.03986 |
| G          | 2.16667  | 0.03306                | 2.39375  | 0.0302  | 2.21358  | 0.02937 |
| H          | 2.04346  | 0.02675                | 2.26846  | 0.04668 | 2.23753  | 0.08957 |
| I          | 1.838    | 0.05454                | 2.16115  | 0.04423 | 2.11942  | 0.07424 |
| J          | 1.86609  | 0.03567                | 2.22     | 0.02806 | 2.0487   | 0.03303 |
| K          | 1.8731   | 0.02682                | 2.25154  | 0.01834 | 2.14786  | 0.03614 |
| M          | 1.90833  | 0.03241                | 2.18111  | 0.01957 | 2.01301  | 0.03589 |
|            |          |                        |          |         |          |         |
| <b>CL1</b> | Mean 1   | SE1                    | Mean 2   | SE2     | Mean 3   | SE3     |
| B          | 2.3125   | 0.62464                | 3.4      | 0.61579 | 1.1      | 0.38406 |
| D          | 2.71429  | 1.35742                | 5.16667  | 1.0918  | 5.11111  | 1.41421 |
| F          | 3.30769  | 0.44732                | 5.03846  | 0.62865 | 4.25     | 0.67259 |
| G          | 5.13333  | 0.7235                 | 6.08333  | 0.88256 | 5        | 0.80204 |
| H          | 2.09091  | 0.55824                | 3.92308  | 0.7679  | 2.77778  | 0.82776 |
| I          | 3.25     | 0.88585                | 2.88462  | 0.66978 | 6.66667  | 1.10554 |
| J          | 2.43478  | 0.70462                | 4.88889  | 0.7286  | 5.88889  | 0.60668 |
| K          | 5.21429  | 0.677                  | 6.19231  | 0.50277 | 4.72222  | 0.8965  |
| M          | 1.95833  | 0.66667                | 2.96296  | 0.58465 | 3.04348  | 0.71371 |
|            |          |                        |          |         |          |         |
| <b>CL2</b> | Mean 1   | SE1                    | Mean 2   | SE2     | Mean 3   | SE3     |
| B          | 3        | 1.12423                | 7.04     | 1.1878  | 1.25     | 0.44741 |
| D          |          |                        | 12.77778 | 2.0473  | 11.66667 | 2.85774 |
| F          | 11.16    | 0.86453                | 10.65385 | 1.72118 | 6.66667  | 1.47263 |
| G          | 13.93103 | 1.29137                | 17.25    | 1.38444 | 11.8     | 0.99594 |
| H          | 9.89474  | 1.44338                | 8.26923  | 1.1912  | 6.88889  | 4.36102 |
| I          | 7.6      | 1.29634                | 11.96154 | 1.69082 | 12.66667 | 2.35702 |
| J          | 7.09091  | 1.626                  | 11.25926 | 1.95059 | 12.11111 | 1.65412 |
| K          | 10.18519 | 0.77885                | 13.57692 | 1.38183 | 6.83333  | 1.23228 |
| M          | 6.45455  | 0.79722                | 14.22222 | 1.05902 | 7.30435  | 1.03884 |
|            |          |                        |          |         |          |         |
| <b>CL3</b> | Mean 1   | SE1                    | Mean 2   | SE2     | Mean 3   | SE3     |
| B          | 4.27273  | 1.04062                | 7.16     | 1.71963 | 4.05     | 1.46527 |
| D          |          |                        | 19.22222 | 3.80614 | 14.875   | 3.53273 |
| F          | 11.875   | 1.41966                | 10.84615 | 2.1916  | 3.41667  | 1.01673 |
| G          | 17.2069  | 1.92058                | 20.875   | 1.88915 | 14.25    | 1.56072 |

|            |          |         |          |         |          |         |
|------------|----------|---------|----------|---------|----------|---------|
| H          | 10.88889 | 1.66188 | 14.03846 | 2.31449 | 4.66667  | 2.27303 |
| I          | 6.77778  | 2.84392 | 15.76923 | 2.74586 | 12.16667 | 5.82142 |
| J          | 8.21053  | 1.66607 | 19.92593 | 2.24906 | 14.77778 | 1.56125 |
| K          | 11.42308 | 0.9857  | 16.80769 | 1.55982 | 6.72222  | 1.64227 |
| M          | 10.47059 | 1.1589  | 15.92593 | 1.77049 | 8.30435  | 1.0526  |
| <b>CL4</b> | Mean 1   | SE1     | Mean 2   | SE2     | Mean 3   | SE3     |
| B          | 2.90909  | 1.06919 | 11.24    | 1.73813 | 4.45     | 1.09525 |
| D          |          |         | 20.11111 | 3.03243 | 17.375   | 4.39922 |
| F          | 13.30435 | 1.58224 | 9.53846  | 2.39419 | 3.08333  | 1.08536 |
| G          | 18.42857 | 1.85623 | 22.20833 | 2.7821  | 14.65    | 1.87697 |
| H          | 11.27778 | 1.44161 | 16.30769 | 2.09404 | 10.11111 | 5.69763 |
| I          | 9.625    | 3.47906 | 15.92308 | 3.68236 | 14       | 5.60753 |
| J          | 12.57895 | 1.63849 | 23.03704 | 2.74621 | 17.88889 | 1.81621 |
| K          | 12.95833 | 0.80592 | 20.03846 | 1.83246 | 12.26667 | 2.32578 |
| M          | 12.41176 | 1.13025 | 15.96296 | 2.00385 | 11.95238 | 1.49317 |
| <b>AM</b>  | Mean 1   | SE1     | Mean 2   | SE2     | Mean 3   | SE3     |
| B          | 7.72305  | 0.68432 | 6.0468   | 0.27039 | 6.58142  | 0.38831 |
| D          | 7.508    | 0.85732 | 6.52889  | 0.39209 | 7.36205  | 0.74563 |
| F          | 5.94724  | 0.2059  | 5.95731  | 0.23634 | 6.47563  | 0.17033 |
| G          | 6.38018  | 0.25681 | 6.23667  | 0.19481 | 6.72361  | 0.26628 |
| H          | 6.52181  | 0.39364 | 6.62192  | 0.28672 | 7.4095   | 1.16907 |
| I          | 6.86785  | 0.42673 | 5.97577  | 0.24111 | 6.83149  | 0.51572 |
| J          | 6.55759  | 0.34808 | 6.68259  | 0.56116 | 6.93879  | 0.33322 |
| K          | 6.53339  | 0.14558 | 6.12115  | 0.16449 | 6.83465  | 0.39046 |
| M          | 6.75191  | 0.4088  | 5.89111  | 0.19927 | 6.46791  | 0.24094 |

---

Klamath<sub>LGT</sub>

---

|            |         |         |         |         |         |         |
|------------|---------|---------|---------|---------|---------|---------|
| <b>SM</b>  | Mean 1  | SE1     | Mean 2  | SE2     | Mean 3  | SE3     |
| D          | 1.98714 | 0.03649 | 2.29962 | 0.02321 | 2.14567 | 0.05293 |
| F          | 1.96633 | 0.02622 | 2.22759 | 0.03078 | 2.04506 | 0.03888 |
| G          | 2.05852 | 0.03268 | 2.40533 | 0.02522 | 2.14567 | 0.04566 |
| H          | 2.01889 | 0.03452 | 2.30095 | 0.02857 | 2.14567 | 0.07557 |
| J          | 1.84786 | 0.03072 | 2.23067 | 0.02247 | 2.14661 | 0.03761 |
| M          | 1.84174 | 0.03283 | 2.18214 | 0.0244  | 2.05927 | 0.05814 |
| <b>CL1</b> | Mean 1  | SE1     | Mean 2  | SE2     | Mean 3  | SE3     |
| D          | 2       | 0.78707 | 4.23077 | 0.72815 | 4.54545 | 0.84092 |
| F          | 3.03333 | 0.49814 | 4.41379 | 0.50161 | 2.63158 | 0.53593 |
| G          | 4.2963  | 0.71308 | 7.66667 | 1.51897 | 4.31579 | 0.64877 |

|            |          |         |          |         |          |         |
|------------|----------|---------|----------|---------|----------|---------|
| H          | 2.37037  | 0.43243 | 3.90909  | 0.61464 | 2.23077  | 0.61592 |
| J          | 3.21429  | 0.84537 | 7.43333  | 0.49566 | 7        | 1.11665 |
| M          | 2.90476  | 0.7962  | 4.03571  | 0.63036 | 1.66667  | 0.97068 |
| <b>CL2</b> | Mean 1   | SE1     | Mean 2   | SE2     | Mean 3   | SE3     |
| D          | 6.5      | 1.82312 | 14.42308 | 2.04383 | 10.36364 | 2.2753  |
| F          | 11.34483 | 1.10771 | 12.17241 | 1.23149 | 5.31579  | 1.0341  |
| G          | 12.22222 | 1.28425 | 18.33333 | 1.58785 | 11.36842 | 1.10417 |
| H          | 8.125    | 0.90669 | 6.54545  | 1.33452 | 4        | 1.50321 |
| J          | 7.39286  | 1.14677 | 18.33333 | 1.16063 | 14       | 1.87248 |
| M          | 7.85714  | 1.07067 | 13.71429 | 0.78201 | 8.05882  | 0.85643 |
| <b>CL3</b> | Mean 1   | SE1     | Mean 2   | SE2     | Mean 3   | SE3     |
| D          | 10.22222 | 1.94414 | 19.03846 | 2.08811 | 11.27273 | 2.92499 |
| F          | 13.2963  | 0.84209 | 10.13793 | 3.07336 | 4.68421  | 0.90418 |
| G          | 16.22222 | 1.51891 | 21.36667 | 1.5178  | 12.33333 | 1.38919 |
| H          | 11.58333 | 0.95769 | 9.95455  | 2.13591 | 4.38462  | 1.17829 |
| J          | 8.96296  | 1.74081 | 20.86667 | 1.22189 | 17.35    | 1.98078 |
| M          | 10.31579 | 0.61281 | 16.14286 | 1.52694 | 11.82353 | 1.26227 |
| <b>CL4</b> | Mean 1   | SE1     | Mean 2   | SE2     | Mean 3   | SE3     |
| D          | 8.28571  | 5.62028 | 22.80769 | 2.63607 | 13.6     | 3.78871 |
| F          | 14.66667 | 1.86017 | 13.44828 | 3.36754 | 4.55556  | 1.8407  |
| G          | 19.14815 | 1.26808 | 22.93333 | 2.41668 | 12.66667 | 1.83317 |
| H          | 10.80952 | 1.79025 | 14.27273 | 3.74578 | 3.84615  | 2.03369 |
| J          | 13.51852 | 1.67346 | 28.73333 | 2.64738 | 19.85    | 2.21464 |
| M          | 8.5      | 1.49642 | 16.92857 | 1.99864 | 12.52941 | 3.21636 |
| <b>AM</b>  | Mean 1   | SE1     | Mean 2   | SE2     | Mean 3   | SE3     |
| D          | 7.54688  | 0.61291 | 6.17923  | 0.17816 | 6.65861  | 0.39264 |
| F          | 6.52135  | 0.29006 | 5.87034  | 0.21236 | 6.82576  | 0.52245 |
| G          | 6.27675  | 0.2578  | 5.97133  | 0.16632 | 6.78611  | 0.45291 |
| H          | 6.46136  | 0.31493 | 6.38091  | 0.23506 | 7.01283  | 0.64546 |
| J          | 6.43364  | 0.30622 | 6.07633  | 0.1188  | 6.74281  | 0.23265 |
| M          | 6.643    | 0.26849 | 5.99571  | 0.12323 | 6.98517  | 0.28321 |

---

Marie

---

|           |         |         |         |         |         |         |
|-----------|---------|---------|---------|---------|---------|---------|
| <b>SM</b> | Mean 1  | SE1     | Mean 2  | SE2     | Mean 3  | SE3     |
| B         | 1.75833 | 0.03236 | 1.885   | 0.0206  |         |         |
| F         | 1.82481 | 0.02514 | 1.90091 | 0.05339 | 1.87289 | 0.02986 |
| H         | 1.75933 | 0.03612 | 1.83353 | 0.03047 |         |         |
| I         | 1.82714 | 0.04104 | 1.80889 | 0.0358  |         |         |

|            |          |         |          |         |         |         |
|------------|----------|---------|----------|---------|---------|---------|
| K          | 1.84704  | 0.02724 | 1.99037  | 0.02055 | 1.92828 | 0.0273  |
| L          | 1.98522  | 0.02253 | 2.04842  | 0.0637  |         |         |
| M          | 1.82875  | 0.03742 | 1.8725   | 0.02862 |         |         |
| <b>CL1</b> | Mean 1   | SE1     | Mean 2   | SE2     | Mean 3  | SE3     |
| B          | 2.36842  | 1.00236 | 0.35714  | 0.33369 |         |         |
| F          | 5.51852  | 0.45134 | 4.14286  | 1.72773 | 2.07143 | 0.67234 |
| H          | 2.46667  | 0.5529  | 1.11765  | 0.52723 |         |         |
| I          | 3.6      | 1.09929 | 0.6      | 0.48553 |         |         |
| K          | 4.37037  | 0.3849  | 4.7037   | 0.4598  | 3.43478 | 0.58994 |
| L          | 5.08333  | 0.81022 | 2.89474  | 1.33074 |         |         |
| M          | 3.125    | 0.83553 | 0.92308  | 0.39099 |         |         |
| <b>CL2</b> | Mean 1   | SE1     | Mean 2   | SE2     | Mean 3  | SE3     |
| B          | 5.52632  | 0.99673 | 0.57143  | 0.22527 |         |         |
| F          | 13.22222 | 1.21144 | 6.57143  | 3.20123 | 5.92857 | 1.39654 |
| H          | 3.6      | 0.89785 | 1.35294  | 0.42462 |         |         |
| I          | 7.93333  | 1.99712 | 2.2      | 1.2333  |         |         |
| K          | 11.96296 | 1.29159 | 12.07407 | 1.33824 | 8.54545 | 1.27277 |
| L          | 11.625   | 1.47148 | 7.89474  | 1.49436 |         |         |
| M          | 6.25     | 0.85928 | 1.30769  | 0.81009 |         |         |
| <b>CL3</b> | Mean 1   | SE1     | Mean 2   | SE2     | Mean 3  | SE3     |
| B          | 5.42105  | 1.10972 | 1.42857  | 0.69607 |         |         |
| F          | 12.59259 | 1.55431 | 3.85714  | 2.01914 | 7.28571 | 1.01835 |
| H          | 4.06667  | 0.88481 | 1.35294  | 0.45659 |         |         |
| I          | 8.86667  | 2.73351 | 3.1      | 1.25681 |         |         |
| K          | 11.77778 | 1.30037 | 14.25926 | 1.66539 | 8.18182 | 1.63249 |
| L          | 10.41667 | 1.92982 | 10.15789 | 3.62889 |         |         |
| M          | 8.5      | 1.34725 | 1.38462  | 0.64659 |         |         |
| <b>CL4</b> | Mean 1   | SE1     | Mean 2   | SE2     | Mean 3  | SE3     |
| B          | 4.78947  | 1.20652 | 1.28571  | 0.62703 |         |         |
| F          | 14.62963 | 1.56889 | 5.35714  | 2.07485 | 5.35714 | 1.46986 |
| H          | 3.6      | 1.12838 | 0.70588  | 0.38315 |         |         |
| I          | 7.26667  | 2.62354 | 3.5      | 1.88542 |         |         |
| K          | 15.44444 | 1.81525 | 17.33333 | 1.80662 | 8.5     | 1.85029 |
| L          | 9.58333  | 1.82357 | 7.31579  | 2.89184 |         |         |
| M          | 7.625    | 2.18111 | 1.84615  | 1.27127 |         |         |
| <b>AM</b>  | Mean 1   | SE1     | Mean 2   | SE2     | Mean 3  | SE3     |
| B          | 6.845    | 0.38082 | 6.55     | 0.79418 |         |         |
| F          | 6.48538  | 0.23584 | 6.47     | 0.38744 | 6.71091 | 0.39535 |

|   |         |         |         |         |         |         |
|---|---------|---------|---------|---------|---------|---------|
| H | 6.78667 | 0.84759 | 6.64765 | 0.52907 |         |         |
| I | 6.78286 | 0.35139 | 6.54111 | 0.33587 |         |         |
| K | 5.52148 | 0.91218 | 6.31259 | 0.14336 | 6.55009 | 0.11752 |
| L | 6.36682 | 0.20068 | 6.56737 | 0.34794 |         |         |
| M | 6.69    | 0.29772 | 6.6325  | 0.56854 |         |         |

---

**Table S3** The number of generations of divergence (GOD), trait-specific genetic variances (VG) and one standard error of the genetic variance for individual genotypes from each of the three experimental populations (Klamath<sub>SGT</sub>, Klamath<sub>LGT</sub>, and Lake Marie<sub>SGT</sub>) for each of the three phenotypic assays.

| Klamath <sub>SGT</sub> |       |         |         |       |         |         |       |         |         |
|------------------------|-------|---------|---------|-------|---------|---------|-------|---------|---------|
| SM                     | GOD 1 | VG 1    | SE1     | GOD 2 | VG 2    | SE2     | GOD 3 | VG 3    | SE3     |
| B                      | 11    | 0       | 0.00463 | 24    | 0.01072 | 0.00769 | 58    | 0.01061 | 0.00969 |
| D                      | 12    | 0.0036  | 0.0087  | 27    | 0.01694 | 0.01313 | 62    | 0.0057  | 0.01613 |
| F                      | 14    | 0.00032 | 0.00485 | 31    | 0       | 0.00294 | 68    | 0.004   | 0.00645 |
| G                      | 11    | 0.0062  | 0.00478 | 28    | 0       | 0.00337 | 63    | 0.00013 | 0.00358 |
| H                      | 13    | 0       | 0.00362 | 28    | 0.01441 | 0.00881 | 61    | 0       | 0.01147 |
| I                      | 13    | 0.00865 | 0.01144 | 28    | 0.00969 | 0.0081  | 60    | 0.00284 | 0.00802 |
| J                      | 14    | 0       | 0.00529 | 30    | 0.00319 | 0.00332 | 67    | 0.00543 | 0.0045  |
| K                      | 13    | 0.00055 | 0.00361 | 29    | 0       | 0.00124 | 64    | 0       | 0.00454 |
| M                      | 12    | 0.00205 | 0.0048  | 29    | 0.00094 | 0.00169 | 65    | 0       | 0.00517 |
|                        |       |         |         |       |         |         |       |         |         |
| CL1                    | GOD 1 | VG 1    | SE1     | GOD 2 | VG 2    | SE2     | GOD 3 | VG 3    | SE3     |
| B                      | 11    | 0.67027 | 1.56848 | 24    | 0       | 1.74764 | 58    | 0.21922 | 0.57401 |
| D                      | 12    | 1.05556 | 5.80913 | 27    | 3.63636 | 4.40911 | 62    | 0       | 3.64095 |
| F                      | 14    | 0       | 0.80324 | 31    | 0.88528 | 1.92736 | 68    | 0.20833 | 1.98974 |
| G                      | 11    | 0       | 2.6108  | 28    | 3.7996  | 2.97242 | 63    | 1.80837 | 2.37236 |
| H                      | 13    | 0.61744 | 1.59833 | 28    | 0       | 1.66246 | 61    | 0       | 0.92617 |
| I                      | 13    | 2.64833 | 3.06826 | 28    | 1.10444 | 1.98736 | 60    | 0       | 0.91961 |
| J                      | 14    | 1.58949 | 2.18545 | 30    | 0       | 2.27256 | 67    | 0.61111 | 1.66505 |
| K                      | 13    | 1.3608  | 2.15364 | 29    | 0       | 1.05822 | 64    | 2.2037  | 2.64732 |
| M                      | 12    | 0       | 1.65521 | 29    | 1.04321 | 1.47896 | 65    | 2.28013 | 1.96756 |



| <b>CL2</b> | GOD 1 | VG 1     | SE1      | GOD 2 | VG 2    | SE2      | GOD 3 | VG 3     | SE3      |
|------------|-------|----------|----------|-------|---------|----------|-------|----------|----------|
| B          | 11    | 4.71748  | 4.73966  | 24    | 0       | 6.23078  | 58    | 0        | 0.74921  |
| D          | 12    |          |          | 27    | 7.09519 | 16.45037 | 62    | 11.66667 | 16.55406 |
| F          | 14    | 0        | 2.81939  | 31    | 8.24783 | 14.18914 | 68    | 0        | 7.55089  |
| G          | 11    | 0        | 5.92863  | 28    | 0       | 8.4872   | 63    | 0        | 3.85083  |
| H          | 13    | 11.98125 | 9.60638  | 28    | 0       | 6.03001  | 61    | 31.44444 | 38.227   |
| I          | 13    | 5.42988  | 5.79037  | 28    | 7.79791 | 12.55674 | 60    | 1.66667  | 8.32407  |
| J          | 14    | 12.91625 | 11.12595 | 30    | 7.87037 | 16.97681 | 67    | 18.79012 | 10.99308 |
| K          | 13    | 3.14634  | 2.70407  | 29    | 6.26562 | 8.24597  | 64    | 0        | 4.14217  |
| M          | 12    | 0.47635  | 3.11998  | 29    | 3.87346 | 4.79727  | 65    | 0        | 3.30408  |

| <b>CL3</b> | GOD 1 | VG 1     | SE1      | GOD 2 | VG 2     | SE2      | GOD 3 | VG 3     | SE3      |
|------------|-------|----------|----------|-------|----------|----------|-------|----------|----------|
| B          | 11    | 1.90012  | 3.39643  | 24    | 0        | 11.32138 | 58    | 8.11374  | 7.68881  |
| D          | 12    |          |          | 27    | 76.2365  | 51.00383 | 62    | 17.96349 | 25.47911 |
| F          | 14    | 3.47412  | 9.29585  | 31    | 25.08792 | 21.57292 | 68    | 0        | 4.03328  |
| G          | 11    | 17.61942 | 16.46678 | 28    | 1.64881  | 15.69624 | 63    | 4.74097  | 9.28993  |
| H          | 13    | 17.00918 | 12.75911 | 28    | 5.00716  | 25.05459 | 61    | 6.88889  | 10.52295 |
| I          | 13    | 26.57576 | 28.44506 | 28    | 50.31203 | 30.47006 | 60    | 0        | 24.04343 |
| J          | 14    | 7.68766  | 12.92731 | 30    | 14.49074 | 22.00781 | 67    | 10.96914 | 10.15621 |
| K          | 13    | 0        | 3.96699  | 29    | 0        | 8.76744  | 64    | 7.05926  | 8.92313  |
| M          | 12    | 0        | 4.85086  | 29    | 8.41049  | 13.71423 | 65    | 0        | 3.22635  |

| <b>CL4</b> | GOD 1 | VG 1    | SE1    | GOD 2 | VG 2 | SE2      | GOD 3 | VG 3     | SE3      |
|------------|-------|---------|--------|-------|------|----------|-------|----------|----------|
| B          | 11    | 2.55733 | 3.4845 | 24    | 0    | 14.88789 | 58    | 0        | 4.83578  |
| D          | 12    |         |        | 27    | 0    | 30.05736 | 62    | 12.75079 | 42.08296 |

|   |    |          |          |    |          |          |    |          |          |
|---|----|----------|----------|----|----------|----------|----|----------|----------|
| F | 14 | 0        | 8.62149  | 31 | 23.79222 | 26.38406 | 68 | 5.85714  | 4.48788  |
| G | 11 | 12.65199 | 15.8692  | 28 | 0        | 19.77745 | 63 | 0        | 9.10526  |
| H | 13 | 0        | 12.61747 | 28 | 6.12314  | 20.15946 | 61 | 29.96296 | 67.99151 |
| I | 13 | 55.71154 | 40.07099 | 28 | 90.52304 | 54.79745 | 60 | 0        | 27.04648 |
| J | 14 | 0        | 12.83642 | 30 | 0        | 24.25649 | 67 | 10.0679  | 14.27202 |
| K | 13 | 0        | 3.4603   | 29 | 0        | 13.54066 | 64 | 12.04771 | 18.65331 |
| M | 12 | 2.77539  | 5.61912  | 29 | 5.8642   | 18.29196 | 65 | 0        | 6.52289  |

| <b>AM</b> | GOD 1 | VG 1    | SE1     | GOD 2 | VG 2    | SE2     | GOD 3 | VG 3    | SE3     |
|-----------|-------|---------|---------|-------|---------|---------|-------|---------|---------|
| B         | 11    | 0       | 1.45661 | 24    | 0       | 0.34591 | 58    | 0       | 0.44262 |
| D         | 12    | 0       | 2.24522 | 27    | 0.04247 | 0.65146 | 62    | 0       | 0.69429 |
| F         | 14    | 0.03682 | 0.19879 | 31    | 0       | 0.22505 | 68    | 0       | 0.11508 |
| G         | 11    | 0       | 0.25139 | 28    | 0.15741 | 0.14706 | 63    | 0.02329 | 0.29191 |
| H         | 13    | 0.52142 | 0.72764 | 28    | 0       | 0.31844 | 61    | 2.64759 | 2.73388 |
| I         | 13    | 0.67891 | 0.68003 | 28    | 0.04236 | 0.27405 | 60    | 0.23072 | 0.37697 |
| J         | 14    | 0.43806 | 0.5344  | 30    | 0       | 1.34215 | 67    | 0       | 0.36319 |
| K         | 13    | 0       | 0.10559 | 29    | 0       | 0.12777 | 64    | 0.59937 | 0.48668 |
| M         | 12    | 0.37698 | 0.75546 | 29    | 0.14571 | 0.16886 | 65    | 0       | 0.2077  |

---

Klamath<sub>LGT</sub>

---

| <b>SM</b> | GOD 1 | VG 1    | SE1     | GOD 2 | VG 2    | SE2     | GOD 3 | VG 3    | SE3     |
|-----------|-------|---------|---------|-------|---------|---------|-------|---------|---------|
| D         | 7     | 0.00215 | 0.00637 | 17    | 0.00106 | 0.00243 | 27    | 0       | 0.00641 |
| F         | 8     | 0.00026 | 0.00347 | 14    | 0.00604 | 0.00411 | 21    | 0       | 0.00464 |
| G         | 7     | 0.00397 | 0.00454 | 13    | 0.00345 | 0.00279 | 20    | 0.00634 | 0.00763 |
| H         | 8     | 0.00203 | 0.00587 | 14    | 0       | 0.00253 | 22    | 0.01461 | 0.01676 |
| J         | 10    | 0       | 0.00412 | 13    | 0       | 0.00202 | 21    | 0.00034 | 0.00579 |

|            |              |             |            |              |             |            |              |             |            |
|------------|--------------|-------------|------------|--------------|-------------|------------|--------------|-------------|------------|
| M          | 9            | 0           | 0.00461    | 17           | 0           | 0.00214    | 29           | 0.01186     | 0.01089    |
| <b>CL1</b> | <b>GOD 1</b> | <b>VG 1</b> | <b>SE1</b> | <b>GOD 2</b> | <b>VG 2</b> | <b>SE2</b> | <b>GOD 3</b> | <b>VG 3</b> | <b>SE3</b> |
| D          | 7            | 0           | 2.85228    | 17           | 0           | 1.79968    | 27           | 0           | 1.66733    |
| F          | 8            | 0.05556     | 1.25804    | 14           | 0.44751     | 1.21967    | 21           | 0.46078     | 1.12272    |
| G          | 7            | 1.62346     | 2.19109    | 13           | 18.79877    | 9.80865    | 20           | 0.51542     | 1.67377    |
| H          | 8            | 0           | 0.78566    | 14           | 0.35714     | 1.65759    | 22           | 0.51493     | 1.18589    |
| J          | 10           | 2.87216     | 3.26131    | 13           | 0           | 1.18363    | 21           | 3.73545     | 4.54557    |
| M          | 9            | 2.59215     | 2.49171    | 17           | 0           | 1.38728    | 29           | 2.45185     | 3.11906    |
| <b>CL2</b> | <b>GOD 1</b> | <b>VG 1</b> | <b>SE1</b> | <b>GOD 2</b> | <b>VG 2</b> | <b>SE2</b> | <b>GOD 3</b> | <b>VG 3</b> | <b>SE3</b> |
| D          | 7            | 0           | 17.23978   | 17           | 21.77046    | 17.21842   | 27           | 0           | 10.16958   |
| F          | 8            | 3.58122     | 5.74376    | 14           | 0           | 7.41623    | 21           | 0           | 3.67561    |
| G          | 7            | 4.60185     | 7.19215    | 13           | 10.19136    | 11.4038    | 20           | 0           | 5.13406    |
| H          | 8            | 1.57059     | 4.13008    | 14           | 0           | 6.1567     | 22           | 0           | 5.01108    |
| J          | 10           | 0           | 6.35242    | 13           | 0.3679      | 6.81771    | 21           | 11.24339    | 12.69729   |
| M          | 9            | 0           | 4.67332    | 17           | 0.66477     | 3.05535    | 29           | 1.05404     | 2.57458    |
| <b>CL3</b> | <b>GOD 1</b> | <b>VG 1</b> | <b>SE1</b> | <b>GOD 2</b> | <b>VG 2</b> | <b>SE2</b> | <b>GOD 3</b> | <b>VG 3</b> | <b>SE3</b> |
| D          | 7            | 13.46875    | 13.24163   | 17           | 11.51225    | 19.20428   | 27           | 0           | 16.0853    |
| F          | 8            | 0           | 3.37041    | 14           | 78.18973    | 40.30733   | 21           | 0           | 3.27047    |
| G          | 7            | 0           | 9.25692    | 13           | 0           | 9.84922    | 20           | 0           | 5.94668    |
| H          | 8            | 0           | 4.19712    | 14           | 0           | 19.56205   | 22           | 0.41978     | 4.69168    |
| J          | 10           | 9.78126     | 14.20807   | 13           | 3.25926     | 7.10506    | 21           | 15.55173    | 13.9879    |
| M          | 9            | 0           | 1.24262    | 17           | 5.63494     | 11.14281   | 29           | 3.3303      | 5.41893    |
| <b>CL4</b> | <b>GOD 1</b> | <b>VG 1</b> | <b>SE1</b> | <b>GOD 2</b> | <b>VG 2</b> | <b>SE2</b> | <b>GOD 3</b> | <b>VG 3</b> | <b>SE3</b> |
| D          | 7            | 0           | 225.2659   | 17           | 4.62771     | 32.83617   | 27           | 0           | 36.75779   |

|   |    |          |          |    |          |          |    |          |          |
|---|----|----------|----------|----|----------|----------|----|----------|----------|
| F | 8  | 21.22666 | 15.15817 | 14 | 79.30437 | 48.82245 | 21 | 0        | 12.04766 |
| G | 7  | 0        | 7.15185  | 13 | 16.31852 | 27.30084 | 20 | 8.82115  | 12.63877 |
| H | 8  | 10.80329 | 12.87009 | 14 | 54.44286 | 55.50351 | 22 | 8.14366  | 12.46742 |
| J | 10 | 0        | 14.30439 | 13 | 0        | 20.42342 | 21 | 4.18271  | 19.66714 |
| M | 9  | 0        | 9.87739  | 17 | 0        | 15.76466 | 29 | 43.16061 | 33.09334 |

|           |       |         |         |       |        |         |       |         |         |
|-----------|-------|---------|---------|-------|--------|---------|-------|---------|---------|
| <b>AM</b> | GOD 1 | VG 1    | SE1     | GOD 2 | VG 2   | SE2     | GOD 3 | VG 3    | SE3     |
| D         | 7     | 1.78587 | 1.60833 | 17    | 0      | 0.13735 | 27    | 0.31066 | 0.38791 |
| F         | 8     | 0.11333 | 0.41094 | 14    | 0.2558 | 0.1978  | 21    | 0       | 0.98734 |
| G         | 7     | 0       | 0.26656 | 13    | 0      | 0.12841 | 20    | 0.81169 | 0.73144 |
| H         | 8     | 0.117   | 0.49791 | 14    | 0      | 0.16037 | 22    | 1.55539 | 1.19434 |
| J         | 10    | 0       | 0.34897 | 13    | 0      | 0.04468 | 21    | 0.18682 | 0.19556 |
| M         | 9     | 0       | 0.3254  | 17    | 0      | 0.07071 | 29    | 0       | 0.23553 |

---

Marie

---

|            |       |         |         |       |         |         |       |         |         |
|------------|-------|---------|---------|-------|---------|---------|-------|---------|---------|
| <b>SM</b>  | GOD 1 | VG 1    | SE1     | GOD 2 | VG 2    | SE2     | GOD 3 | VG 3    | SE3     |
| B          | 12    | 0.01423 | 0.01715 | 27    | 0.04173 | 0.06589 |       |         |         |
| F          | 14    | 0.00068 | 0.00292 | 32    | 0.01032 | 0.00842 | 57    | 0.00145 | 0.00272 |
| H          | 14    | 0.00389 | 0.00497 | 30    | 0.00349 | 0.00299 |       |         |         |
| I          | 12    | 0.00241 | 0.00715 | 28    | 0       | 0.00319 |       |         |         |
| J          | 18    | 0.00298 | 0.00313 | 36    | 0       | 0.00149 |       |         |         |
| K          | 13    | 0       | 0.00191 | 29    | 0.02116 | 0.01448 | 66    | 0.00246 | 0.00327 |
| M          | 12    | 0.00221 | 0.00493 | 27    | 0       | 0.00452 |       |         |         |
| <b>CL1</b> | GOD 1 | VG 1    | SE1     | GOD 2 | VG 2    | SE2     | GOD 3 | VG 3    | SE3     |
| B          | 12    | 9.2037  | 8.67665 | 27    | 6.71739 | 6.431   |       |         |         |
| F          | 14    | 0       | 0.69411 | 32    | 9.20133 | 8.585   | 57    | 0       | 0.87258 |

|            |              |             |            |              |             |            |              |             |            |
|------------|--------------|-------------|------------|--------------|-------------|------------|--------------|-------------|------------|
| H          | 14           | 0.73882     | 1.19822    | 30           | 0           | 0.63302    |              |             |            |
| I          | 12           | 0           | 3.96674    | 28           | 0.08784     | 0.6793     |              |             |            |
| J          | 18           | 0           | 0.64209    | 36           | 0           | 1.01125    |              |             |            |
| K          | 13           | 2.48413     | 2.56716    | 29           | 7.56209     | 6.36515    | 66           | 1.01496     | 1.5472     |
| M          | 12           | 0           | 1.7041     | 27           | 1.0473      | 0.64683    |              |             |            |
| <b>CL2</b> | <b>GOD 1</b> | <b>VG 1</b> | <b>SE1</b> | <b>GOD 2</b> | <b>VG 2</b> | <b>SE2</b> | <b>GOD 3</b> | <b>VG 3</b> | <b>SE3</b> |
| B          | 12           | 19.93519    | 17.86768   | 27           | 40.47101    | 37.59285   |              |             |            |
| F          | 14           | 0           | 4.99088    | 32           | 27.80247    | 29.76014   | 57           | 1.41952     | 6.28477    |
| H          | 14           | 0.90921     | 3.4171     | 30           | 0           | 0.46764    |              |             |            |
| I          | 12           | 1.49069     | 17.80141   | 28           | 2.00676     | 4.01669    |              |             |            |
| J          | 18           | 0           | 5.84921    | 36           | 4.14198     | 7.92738    |              |             |            |
| K          | 13           | 2.5873      | 9.24041    | 29           | 9.85948     | 8.01073    | 66           | 1.21352     | 7.9515     |
| M          | 12           | 0           | 1.94786    | 27           | 1.91216     | 3.54373    |              |             |            |
| <b>CL3</b> | <b>GOD 1</b> | <b>VG 1</b> | <b>SE1</b> | <b>GOD 2</b> | <b>VG 2</b> | <b>SE2</b> | <b>GOD 3</b> | <b>VG 3</b> | <b>SE3</b> |
| B          | 12           | 0           | 14.54704   | 27           | 3.65217     | 11.19872   |              |             |            |
| F          | 14           | 8.98148     | 10.26047   | 32           | 8.41026     | 12.14323   | 57           | 0           | 3.34979    |
| H          | 14           | 0           | 2.97304    | 30           | 0.42525     | 0.71062    |              |             |            |
| I          | 12           | 29.64295    | 27.73263   | 28           | 2.0473      | 4.17883    |              |             |            |
| J          | 18           | 2.97222     | 7.62431    | 36           | 13.17593    | 11.49367   |              |             |            |
| K          | 13           | 0           | 10.5852    | 29           | 70.7549     | 46.98801   | 66           | 10.4229     | 11.5278    |
| M          | 12           | 0           | 7.00063    | 27           | 1.06081     | 2.33114    |              |             |            |
| <b>CL4</b> | <b>GOD 1</b> | <b>VG 1</b> | <b>SE1</b> | <b>GOD 2</b> | <b>VG 2</b> | <b>SE2</b> | <b>GOD 3</b> | <b>VG 3</b> | <b>SE3</b> |
| B          | 12           | 2.10185     | 15.29273   | 27           | 131.3623    | 118.5344   |              |             |            |
| F          | 14           | 0           | 11.12182   | 32           | 7.83357     | 12.9765    | 57           | 0           | 5.78328    |
| H          | 14           | 4.98487     | 4.67624    | 30           | 0.43889     | 0.48224    |              |             |            |

|           |              |             |            |              |             |            |              |             |            |
|-----------|--------------|-------------|------------|--------------|-------------|------------|--------------|-------------|------------|
| I         | 12           | 26.85638    | 25.58624   | 28           | 0           | 6.34153    |              |             |            |
| J         | 18           | 5.47222     | 14.90671   | 36           | 2.19753     | 15.29665   |              |             |            |
| K         | 13           | 0           | 9.90451    | 29           | 22.73203    | 31.25187   | 66           | 0.73347     | 17.22923   |
| M         | 12           | 0           | 11.47289   | 27           | 12.13851    | 6.78263    |              |             |            |
| <b>AM</b> | <b>GOD 1</b> | <b>VG 1</b> | <b>SE1</b> | <b>GOD 2</b> | <b>VG 2</b> | <b>SE2</b> | <b>GOD 3</b> | <b>VG 3</b> | <b>SE3</b> |
| B         | 12           | 1.05695     | 1.38772    | 27           | 2.18494     | 3.23428    |              |             |            |
| F         | 14           | 0.04329     | 0.2617     | 32           | 0.2201      | 0.48058    | 57           | 0.23385     | 0.47953    |
| H         | 14           | 2.91159     | 2.62771    | 30           | 0.17802     | 1.02716    |              |             |            |
| I         | 12           | 0           | 0.45979    | 28           | 0.2054      | 0.28981    |              |             |            |
| J         | 18           | 1.94543     | 3.68016    | 36           | 0           | 0.07784    |              |             |            |
| K         | 13           | 0           | 0.12012    | 29           | 0.2934      | 0.45727    | 66           | 0           | 0.04555    |
| M         | 12           | 0           | 0.29046    | 27           | 0.48353     | 1.74699    |              |             |            |

---

**Table S4 Trait-specific estimates of  $\Delta V$  (VAR) and  $\Delta M$  (MEAN) for individual genotypes from each of the three experimental populations (Klamath<sub>SGT</sub>, Klamath<sub>LGT</sub>, and Lake Marie<sub>SGT</sub>).**

| Population             | Genotype | SM <sub>VAR</sub> | SM <sub>MEAN</sub> | CL1 <sub>VAR</sub> | CL1 <sub>MEAN</sub> | CL2 <sub>VAR</sub> | CL2 <sub>MEAN</sub> | CL3 <sub>VAR</sub> | CL3 <sub>MEAN</sub> | CL4 <sub>VAR</sub> | CL4 <sub>MEAN</sub> | AM <sub>VAR</sub> | AM <sub>MEAN</sub> |
|------------------------|----------|-------------------|--------------------|--------------------|---------------------|--------------------|---------------------|--------------------|---------------------|--------------------|---------------------|-------------------|--------------------|
| Marie                  | B        | 0.00000           | 0.00870            | 0.00790            | -0.13400            | 0.00290            | -0.33100            | 0.05230            | -0.26600            | 0.02640            | -0.23300            | 0.01140           | -0.02000           |
|                        | F        | 0.00005           | 0.00110            | 0.00021            | -0.08020            | 0.00003            | -0.16700            | 0.00010            | -0.09690            | 0.04900            | -0.20250            | 0.00790           | 0.00500            |
|                        | H        | 0.00014           | 0.00440            | 0.00540            | -0.08400            | 0.00190            | -0.14100            | 0.01350            | -0.17000            | 0.02210            | -0.18100            | 0.02180           | -0.00800           |
|                        | I        | 0.00002           | -0.00130           | 0.00304            | -0.18800            | 0.07400            | -0.35800            | 0.13800            | -0.36100            | 0.09700            | -0.23600            | 0.00658           | -0.01500           |
|                        | K        | 0.00003           | 0.00120            | 0.00940            | -0.01990            | 0.03760            | -0.07580            | 0.20250            | -0.08170            | 0.04060            | -0.15950            | 0.00009           | 0.01290            |
|                        | L        | 0.00030           | 0.00380            | 0.23700            | -0.13700            | 0.31900            | -0.23400            | 1.29000            | -0.01630            | 0.47800            | -0.14100            | 0.00570           | 0.01250            |
|                        | M        | 0.00003           | 0.00270            | 0.03600            | -0.14700            | 0.05210            | -0.32900            | 0.03700            | -0.47500            | 0.40300            | -0.38500            | 0.00820           | -0.00400           |
| Klamath <sub>SGT</sub> | B        | 0.00008           | 0.00300            | 0.00400            | -0.03600            | 0.00200            | -0.07300            | 0.12800            | -0.01400            | 0.01050            | -0.00037            | 0.00000           | -0.00700           |
|                        | D        | 0.00020           | 0.00300            | 0.01900            | 0.03800             | 0.20000            | -0.03200            | 0.50900            | -0.12400            | 0.16300            | -0.07700            | 0.00026           | 0.00500            |
|                        | F        | 0.00004           | 0.00400            | 0.00700            | 0.01500             | 0.02400            | -0.08500            | 0.03400            | -0.16300            | 0.10700            | -0.18700            | 0.00006           | 0.01060            |
|                        | G        | 0.00001           | -0.00010           | 0.04200            | -0.00600            | 0.00000            | -0.06100            | 0.09700            | -0.08100            | 0.01800            | -0.08800            | 0.00180           | 0.00780            |
|                        | H        | 0.00010           | 0.00500            | 0.00100            | 0.01100             | 0.27100            | -0.06500            | 0.50200            | -0.00400            | 0.04780            | -0.10900            | 0.01690           | 0.01790            |
|                        | I        | 0.00012           | 0.00500            | 0.00600            | 0.07900             | 0.07900            | 0.10600             | 0.32100            | 0.11200             | 0.42300            | 0.08300             | 0.00430           | 0.00400            |
|                        | J        | 0.00008           | 0.00100            | 0.01100            | 0.05800             | 0.30200            | 0.08400             | 0.20200            | 0.08400             | 0.12900            | 0.07300             | 0.00086           | 0.00720            |
|                        | K        |                   | 0.00400            | 0.02500            | -0.01400            | 0.03200            | -0.07300            | 0.08500            | -0.10200            | 0.12500            | -0.00300            | 0.00470           | 0.00510            |
| M                      | 0.00002  | 0.00200           | 0.03400            | 0.01800            | 0.01700             | 0.00300            | 0.01270             | -0.06300           | 0.02120             | -0.01600           | 0.00120             | 0.00180           |                    |
| Klamath <sub>LGT</sub> | D        | 0.00004           | 0.00900            | 0.00000            | 0.12900             | 0.23500            | 0.21500             | 0.27000            | 0.11400             | 0.07800            | 0.15700             | 0.00700           | -0.03200           |
|                        | F        | 0.00014           | 0.00700            | 0.01700            | 0.18200             | 0.03170            | -0.48200            | 0.17100            | -0.66400            | 0.75700            | -0.78700            | 0.01300           | 0.01100            |
|                        | G        | 0.00030           | 0.01030            | 0.13000            | -0.01200            | 0.16200            | -0.10700            |                    | -0.34100            | 0.48600            | -0.47200            | 0.01100           | 0.03100            |
|                        | H        | 0.00020           | 0.01500            | 0.02100            | -0.00700            | 0.02100            | -0.29800            | 0.01500            | -0.51600            | 0.73600            | -0.51200            | 0.01700           | 0.03500            |
|                        | J        |                   | 0.02000            | 0.07000            | 0.40700             | 0.25600            | 0.45900             | 0.58100            | 0.48500             | 0.11800            | 0.37300             | 0.00320           | 0.05000            |
|                        | M        | 0.00010           | 0.01300            | 0.06300            | -0.07000            | 0.03500            | -0.05600            | 0.10700            | 0.09300             | 0.72800            | 0.24500             |                   | 0.02500            |
