# Supplementary material
Source: PubMed Central journal article supplement (PMC3567742)
Supplement: ac428f009caf73e5acb27ad98d9edbe8_genetics.112.146571-5.pdf [file ac428f009caf73e5acb27ad98d9edbe8_genetics.112.146571-5.pdf]

**Table S3** The number of generations of divergence (GOD), trait-specific genetic variances (VG) and one standard error of the genetic variance for individual genotypes from each of the three experimental populations (Klamath<sub>SGT</sub>, Klamath<sub>LGT</sub>, and Lake Marie<sub>SGT</sub>) for each of the three phenotypic assays.

| Klamath <sub>SGT</sub> |       |         |         |       |         |         |       |         |         |
|------------------------|-------|---------|---------|-------|---------|---------|-------|---------|---------|
| SM                     | GOD 1 | VG 1    | SE1     | GOD 2 | VG 2    | SE2     | GOD 3 | VG 3    | SE3     |
| B                      | 11    | 0       | 0.00463 | 24    | 0.01072 | 0.00769 | 58    | 0.01061 | 0.00969 |
| D                      | 12    | 0.0036  | 0.0087  | 27    | 0.01694 | 0.01313 | 62    | 0.0057  | 0.01613 |
| F                      | 14    | 0.00032 | 0.00485 | 31    | 0       | 0.00294 | 68    | 0.004   | 0.00645 |
| G                      | 11    | 0.0062  | 0.00478 | 28    | 0       | 0.00337 | 63    | 0.00013 | 0.00358 |
| H                      | 13    | 0       | 0.00362 | 28    | 0.01441 | 0.00881 | 61    | 0       | 0.01147 |
| I                      | 13    | 0.00865 | 0.01144 | 28    | 0.00969 | 0.0081  | 60    | 0.00284 | 0.00802 |
| J                      | 14    | 0       | 0.00529 | 30    | 0.00319 | 0.00332 | 67    | 0.00543 | 0.0045  |
| K                      | 13    | 0.00055 | 0.00361 | 29    | 0       | 0.00124 | 64    | 0       | 0.00454 |
| M                      | 12    | 0.00205 | 0.0048  | 29    | 0.00094 | 0.00169 | 65    | 0       | 0.00517 |
|                        |       |         |         |       |         |         |       |         |         |
| CL1                    | GOD 1 | VG 1    | SE1     | GOD 2 | VG 2    | SE2     | GOD 3 | VG 3    | SE3     |
| B                      | 11    | 0.67027 | 1.56848 | 24    | 0       | 1.74764 | 58    | 0.21922 | 0.57401 |
| D                      | 12    | 1.05556 | 5.80913 | 27    | 3.63636 | 4.40911 | 62    | 0       | 3.64095 |
| F                      | 14    | 0       | 0.80324 | 31    | 0.88528 | 1.92736 | 68    | 0.20833 | 1.98974 |
| G                      | 11    | 0       | 2.6108  | 28    | 3.7996  | 2.97242 | 63    | 1.80837 | 2.37236 |
| H                      | 13    | 0.61744 | 1.59833 | 28    | 0       | 1.66246 | 61    | 0       | 0.92617 |
| I                      | 13    | 2.64833 | 3.06826 | 28    | 1.10444 | 1.98736 | 60    | 0       | 0.91961 |
| J                      | 14    | 1.58949 | 2.18545 | 30    | 0       | 2.27256 | 67    | 0.61111 | 1.66505 |
| K                      | 13    | 1.3608  | 2.15364 | 29    | 0       | 1.05822 | 64    | 2.2037  | 2.64732 |
| M                      | 12    | 0       | 1.65521 | 29    | 1.04321 | 1.47896 | 65    | 2.28013 | 1.96756 |

| <b>CL2</b> | GOD 1 | VG 1     | SE1      | GOD 2 | VG 2    | SE2      | GOD 3 | VG 3     | SE3      |
|------------|-------|----------|----------|-------|---------|----------|-------|----------|----------|
| B          | 11    | 4.71748  | 4.73966  | 24    | 0       | 6.23078  | 58    | 0        | 0.74921  |
| D          | 12    |          |          | 27    | 7.09519 | 16.45037 | 62    | 11.66667 | 16.55406 |
| F          | 14    | 0        | 2.81939  | 31    | 8.24783 | 14.18914 | 68    | 0        | 7.55089  |
| G          | 11    | 0        | 5.92863  | 28    | 0       | 8.4872   | 63    | 0        | 3.85083  |
| H          | 13    | 11.98125 | 9.60638  | 28    | 0       | 6.03001  | 61    | 31.44444 | 38.227   |
| I          | 13    | 5.42988  | 5.79037  | 28    | 7.79791 | 12.55674 | 60    | 1.66667  | 8.32407  |
| J          | 14    | 12.91625 | 11.12595 | 30    | 7.87037 | 16.97681 | 67    | 18.79012 | 10.99308 |
| K          | 13    | 3.14634  | 2.70407  | 29    | 6.26562 | 8.24597  | 64    | 0        | 4.14217  |
| M          | 12    | 0.47635  | 3.11998  | 29    | 3.87346 | 4.79727  | 65    | 0        | 3.30408  |

| <b>CL3</b> | GOD 1 | VG 1     | SE1      | GOD 2 | VG 2     | SE2      | GOD 3 | VG 3     | SE3      |
|------------|-------|----------|----------|-------|----------|----------|-------|----------|----------|
| B          | 11    | 1.90012  | 3.39643  | 24    | 0        | 11.32138 | 58    | 8.11374  | 7.68881  |
| D          | 12    |          |          | 27    | 76.2365  | 51.00383 | 62    | 17.96349 | 25.47911 |
| F          | 14    | 3.47412  | 9.29585  | 31    | 25.08792 | 21.57292 | 68    | 0        | 4.03328  |
| G          | 11    | 17.61942 | 16.46678 | 28    | 1.64881  | 15.69624 | 63    | 4.74097  | 9.28993  |
| H          | 13    | 17.00918 | 12.75911 | 28    | 5.00716  | 25.05459 | 61    | 6.88889  | 10.52295 |
| I          | 13    | 26.57576 | 28.44506 | 28    | 50.31203 | 30.47006 | 60    | 0        | 24.04343 |
| J          | 14    | 7.68766  | 12.92731 | 30    | 14.49074 | 22.00781 | 67    | 10.96914 | 10.15621 |
| K          | 13    | 0        | 3.96699  | 29    | 0        | 8.76744  | 64    | 7.05926  | 8.92313  |
| M          | 12    | 0        | 4.85086  | 29    | 8.41049  | 13.71423 | 65    | 0        | 3.22635  |

| <b>CL4</b> | GOD 1 | VG 1    | SE1    | GOD 2 | VG 2 | SE2      | GOD 3 | VG 3     | SE3      |
|------------|-------|---------|--------|-------|------|----------|-------|----------|----------|
| B          | 11    | 2.55733 | 3.4845 | 24    | 0    | 14.88789 | 58    | 0        | 4.83578  |
| D          | 12    |         |        | 27    | 0    | 30.05736 | 62    | 12.75079 | 42.08296 |

|   |    |          |          |    |          |          |    |          |          |
|---|----|----------|----------|----|----------|----------|----|----------|----------|
| F | 14 | 0        | 8.62149  | 31 | 23.79222 | 26.38406 | 68 | 5.85714  | 4.48788  |
| G | 11 | 12.65199 | 15.8692  | 28 | 0        | 19.77745 | 63 | 0        | 9.10526  |
| H | 13 | 0        | 12.61747 | 28 | 6.12314  | 20.15946 | 61 | 29.96296 | 67.99151 |
| I | 13 | 55.71154 | 40.07099 | 28 | 90.52304 | 54.79745 | 60 | 0        | 27.04648 |
| J | 14 | 0        | 12.83642 | 30 | 0        | 24.25649 | 67 | 10.0679  | 14.27202 |
| K | 13 | 0        | 3.4603   | 29 | 0        | 13.54066 | 64 | 12.04771 | 18.65331 |
| M | 12 | 2.77539  | 5.61912  | 29 | 5.8642   | 18.29196 | 65 | 0        | 6.52289  |

| <b>AM</b> | GOD 1 | VG 1    | SE1     | GOD 2 | VG 2    | SE2     | GOD 3 | VG 3    | SE3     |
|-----------|-------|---------|---------|-------|---------|---------|-------|---------|---------|
| B         | 11    | 0       | 1.45661 | 24    | 0       | 0.34591 | 58    | 0       | 0.44262 |
| D         | 12    | 0       | 2.24522 | 27    | 0.04247 | 0.65146 | 62    | 0       | 0.69429 |
| F         | 14    | 0.03682 | 0.19879 | 31    | 0       | 0.22505 | 68    | 0       | 0.11508 |
| G         | 11    | 0       | 0.25139 | 28    | 0.15741 | 0.14706 | 63    | 0.02329 | 0.29191 |
| H         | 13    | 0.52142 | 0.72764 | 28    | 0       | 0.31844 | 61    | 2.64759 | 2.73388 |
| I         | 13    | 0.67891 | 0.68003 | 28    | 0.04236 | 0.27405 | 60    | 0.23072 | 0.37697 |
| J         | 14    | 0.43806 | 0.5344  | 30    | 0       | 1.34215 | 67    | 0       | 0.36319 |
| K         | 13    | 0       | 0.10559 | 29    | 0       | 0.12777 | 64    | 0.59937 | 0.48668 |
| M         | 12    | 0.37698 | 0.75546 | 29    | 0.14571 | 0.16886 | 65    | 0       | 0.2077  |

---

Klamath<sub>LGT</sub>

---

| <b>SM</b> | GOD 1 | VG 1    | SE1     | GOD 2 | VG 2    | SE2     | GOD 3 | VG 3    | SE3     |
|-----------|-------|---------|---------|-------|---------|---------|-------|---------|---------|
| D         | 7     | 0.00215 | 0.00637 | 17    | 0.00106 | 0.00243 | 27    | 0       | 0.00641 |
| F         | 8     | 0.00026 | 0.00347 | 14    | 0.00604 | 0.00411 | 21    | 0       | 0.00464 |
| G         | 7     | 0.00397 | 0.00454 | 13    | 0.00345 | 0.00279 | 20    | 0.00634 | 0.00763 |
| H         | 8     | 0.00203 | 0.00587 | 14    | 0       | 0.00253 | 22    | 0.01461 | 0.01676 |
| J         | 10    | 0       | 0.00412 | 13    | 0       | 0.00202 | 21    | 0.00034 | 0.00579 |

|            |              |             |            |              |             |            |              |             |            |
|------------|--------------|-------------|------------|--------------|-------------|------------|--------------|-------------|------------|
| M          | 9            | 0           | 0.00461    | 17           | 0           | 0.00214    | 29           | 0.01186     | 0.01089    |
| <b>CL1</b> | <b>GOD 1</b> | <b>VG 1</b> | <b>SE1</b> | <b>GOD 2</b> | <b>VG 2</b> | <b>SE2</b> | <b>GOD 3</b> | <b>VG 3</b> | <b>SE3</b> |
| D          | 7            | 0           | 2.85228    | 17           | 0           | 1.79968    | 27           | 0           | 1.66733    |
| F          | 8            | 0.05556     | 1.25804    | 14           | 0.44751     | 1.21967    | 21           | 0.46078     | 1.12272    |
| G          | 7            | 1.62346     | 2.19109    | 13           | 18.79877    | 9.80865    | 20           | 0.51542     | 1.67377    |
| H          | 8            | 0           | 0.78566    | 14           | 0.35714     | 1.65759    | 22           | 0.51493     | 1.18589    |
| J          | 10           | 2.87216     | 3.26131    | 13           | 0           | 1.18363    | 21           | 3.73545     | 4.54557    |
| M          | 9            | 2.59215     | 2.49171    | 17           | 0           | 1.38728    | 29           | 2.45185     | 3.11906    |
| <b>CL2</b> | <b>GOD 1</b> | <b>VG 1</b> | <b>SE1</b> | <b>GOD 2</b> | <b>VG 2</b> | <b>SE2</b> | <b>GOD 3</b> | <b>VG 3</b> | <b>SE3</b> |
| D          | 7            | 0           | 17.23978   | 17           | 21.77046    | 17.21842   | 27           | 0           | 10.16958   |
| F          | 8            | 3.58122     | 5.74376    | 14           | 0           | 7.41623    | 21           | 0           | 3.67561    |
| G          | 7            | 4.60185     | 7.19215    | 13           | 10.19136    | 11.4038    | 20           | 0           | 5.13406    |
| H          | 8            | 1.57059     | 4.13008    | 14           | 0           | 6.1567     | 22           | 0           | 5.01108    |
| J          | 10           | 0           | 6.35242    | 13           | 0.3679      | 6.81771    | 21           | 11.24339    | 12.69729   |
| M          | 9            | 0           | 4.67332    | 17           | 0.66477     | 3.05535    | 29           | 1.05404     | 2.57458    |
| <b>CL3</b> | <b>GOD 1</b> | <b>VG 1</b> | <b>SE1</b> | <b>GOD 2</b> | <b>VG 2</b> | <b>SE2</b> | <b>GOD 3</b> | <b>VG 3</b> | <b>SE3</b> |
| D          | 7            | 13.46875    | 13.24163   | 17           | 11.51225    | 19.20428   | 27           | 0           | 16.0853    |
| F          | 8            | 0           | 3.37041    | 14           | 78.18973    | 40.30733   | 21           | 0           | 3.27047    |
| G          | 7            | 0           | 9.25692    | 13           | 0           | 9.84922    | 20           | 0           | 5.94668    |
| H          | 8            | 0           | 4.19712    | 14           | 0           | 19.56205   | 22           | 0.41978     | 4.69168    |
| J          | 10           | 9.78126     | 14.20807   | 13           | 3.25926     | 7.10506    | 21           | 15.55173    | 13.9879    |
| M          | 9            | 0           | 1.24262    | 17           | 5.63494     | 11.14281   | 29           | 3.3303      | 5.41893    |
| <b>CL4</b> | <b>GOD 1</b> | <b>VG 1</b> | <b>SE1</b> | <b>GOD 2</b> | <b>VG 2</b> | <b>SE2</b> | <b>GOD 3</b> | <b>VG 3</b> | <b>SE3</b> |
| D          | 7            | 0           | 225.2659   | 17           | 4.62771     | 32.83617   | 27           | 0           | 36.75779   |

|   |    |          |          |    |          |          |    |          |          |
|---|----|----------|----------|----|----------|----------|----|----------|----------|
| F | 8  | 21.22666 | 15.15817 | 14 | 79.30437 | 48.82245 | 21 | 0        | 12.04766 |
| G | 7  | 0        | 7.15185  | 13 | 16.31852 | 27.30084 | 20 | 8.82115  | 12.63877 |
| H | 8  | 10.80329 | 12.87009 | 14 | 54.44286 | 55.50351 | 22 | 8.14366  | 12.46742 |
| J | 10 | 0        | 14.30439 | 13 | 0        | 20.42342 | 21 | 4.18271  | 19.66714 |
| M | 9  | 0        | 9.87739  | 17 | 0        | 15.76466 | 29 | 43.16061 | 33.09334 |

|           |       |         |         |       |        |         |       |         |         |
|-----------|-------|---------|---------|-------|--------|---------|-------|---------|---------|
| <b>AM</b> | GOD 1 | VG 1    | SE1     | GOD 2 | VG 2   | SE2     | GOD 3 | VG 3    | SE3     |
| D         | 7     | 1.78587 | 1.60833 | 17    | 0      | 0.13735 | 27    | 0.31066 | 0.38791 |
| F         | 8     | 0.11333 | 0.41094 | 14    | 0.2558 | 0.1978  | 21    | 0       | 0.98734 |
| G         | 7     | 0       | 0.26656 | 13    | 0      | 0.12841 | 20    | 0.81169 | 0.73144 |
| H         | 8     | 0.117   | 0.49791 | 14    | 0      | 0.16037 | 22    | 1.55539 | 1.19434 |
| J         | 10    | 0       | 0.34897 | 13    | 0      | 0.04468 | 21    | 0.18682 | 0.19556 |
| M         | 9     | 0       | 0.3254  | 17    | 0      | 0.07071 | 29    | 0       | 0.23553 |

---

Marie

---

|            |       |         |         |       |         |         |       |         |         |
|------------|-------|---------|---------|-------|---------|---------|-------|---------|---------|
| <b>SM</b>  | GOD 1 | VG 1    | SE1     | GOD 2 | VG 2    | SE2     | GOD 3 | VG 3    | SE3     |
| B          | 12    | 0.01423 | 0.01715 | 27    | 0.04173 | 0.06589 |       |         |         |
| F          | 14    | 0.00068 | 0.00292 | 32    | 0.01032 | 0.00842 | 57    | 0.00145 | 0.00272 |
| H          | 14    | 0.00389 | 0.00497 | 30    | 0.00349 | 0.00299 |       |         |         |
| I          | 12    | 0.00241 | 0.00715 | 28    | 0       | 0.00319 |       |         |         |
| J          | 18    | 0.00298 | 0.00313 | 36    | 0       | 0.00149 |       |         |         |
| K          | 13    | 0       | 0.00191 | 29    | 0.02116 | 0.01448 | 66    | 0.00246 | 0.00327 |
| M          | 12    | 0.00221 | 0.00493 | 27    | 0       | 0.00452 |       |         |         |
| <b>CL1</b> | GOD 1 | VG 1    | SE1     | GOD 2 | VG 2    | SE2     | GOD 3 | VG 3    | SE3     |
| B          | 12    | 9.2037  | 8.67665 | 27    | 6.71739 | 6.431   |       |         |         |
| F          | 14    | 0       | 0.69411 | 32    | 9.20133 | 8.585   | 57    | 0       | 0.87258 |

|            |              |             |            |              |             |            |              |             |            |
|------------|--------------|-------------|------------|--------------|-------------|------------|--------------|-------------|------------|
| H          | 14           | 0.73882     | 1.19822    | 30           | 0           | 0.63302    |              |             |            |
| I          | 12           | 0           | 3.96674    | 28           | 0.08784     | 0.6793     |              |             |            |
| J          | 18           | 0           | 0.64209    | 36           | 0           | 1.01125    |              |             |            |
| K          | 13           | 2.48413     | 2.56716    | 29           | 7.56209     | 6.36515    | 66           | 1.01496     | 1.5472     |
| M          | 12           | 0           | 1.7041     | 27           | 1.0473      | 0.64683    |              |             |            |
| <b>CL2</b> | <b>GOD 1</b> | <b>VG 1</b> | <b>SE1</b> | <b>GOD 2</b> | <b>VG 2</b> | <b>SE2</b> | <b>GOD 3</b> | <b>VG 3</b> | <b>SE3</b> |
| B          | 12           | 19.93519    | 17.86768   | 27           | 40.47101    | 37.59285   |              |             |            |
| F          | 14           | 0           | 4.99088    | 32           | 27.80247    | 29.76014   | 57           | 1.41952     | 6.28477    |
| H          | 14           | 0.90921     | 3.4171     | 30           | 0           | 0.46764    |              |             |            |
| I          | 12           | 1.49069     | 17.80141   | 28           | 2.00676     | 4.01669    |              |             |            |
| J          | 18           | 0           | 5.84921    | 36           | 4.14198     | 7.92738    |              |             |            |
| K          | 13           | 2.5873      | 9.24041    | 29           | 9.85948     | 8.01073    | 66           | 1.21352     | 7.9515     |
| M          | 12           | 0           | 1.94786    | 27           | 1.91216     | 3.54373    |              |             |            |
| <b>CL3</b> | <b>GOD 1</b> | <b>VG 1</b> | <b>SE1</b> | <b>GOD 2</b> | <b>VG 2</b> | <b>SE2</b> | <b>GOD 3</b> | <b>VG 3</b> | <b>SE3</b> |
| B          | 12           | 0           | 14.54704   | 27           | 3.65217     | 11.19872   |              |             |            |
| F          | 14           | 8.98148     | 10.26047   | 32           | 8.41026     | 12.14323   | 57           | 0           | 3.34979    |
| H          | 14           | 0           | 2.97304    | 30           | 0.42525     | 0.71062    |              |             |            |
| I          | 12           | 29.64295    | 27.73263   | 28           | 2.0473      | 4.17883    |              |             |            |
| J          | 18           | 2.97222     | 7.62431    | 36           | 13.17593    | 11.49367   |              |             |            |
| K          | 13           | 0           | 10.5852    | 29           | 70.7549     | 46.98801   | 66           | 10.4229     | 11.5278    |
| M          | 12           | 0           | 7.00063    | 27           | 1.06081     | 2.33114    |              |             |            |
| <b>CL4</b> | <b>GOD 1</b> | <b>VG 1</b> | <b>SE1</b> | <b>GOD 2</b> | <b>VG 2</b> | <b>SE2</b> | <b>GOD 3</b> | <b>VG 3</b> | <b>SE3</b> |
| B          | 12           | 2.10185     | 15.29273   | 27           | 131.3623    | 118.5344   |              |             |            |
| F          | 14           | 0           | 11.12182   | 32           | 7.83357     | 12.9765    | 57           | 0           | 5.78328    |
| H          | 14           | 4.98487     | 4.67624    | 30           | 0.43889     | 0.48224    |              |             |            |

|           |              |             |            |              |             |            |              |             |            |
|-----------|--------------|-------------|------------|--------------|-------------|------------|--------------|-------------|------------|
| I         | 12           | 26.85638    | 25.58624   | 28           | 0           | 6.34153    |              |             |            |
| J         | 18           | 5.47222     | 14.90671   | 36           | 2.19753     | 15.29665   |              |             |            |
| K         | 13           | 0           | 9.90451    | 29           | 22.73203    | 31.25187   | 66           | 0.73347     | 17.22923   |
| M         | 12           | 0           | 11.47289   | 27           | 12.13851    | 6.78263    |              |             |            |
| <b>AM</b> | <b>GOD 1</b> | <b>VG 1</b> | <b>SE1</b> | <b>GOD 2</b> | <b>VG 2</b> | <b>SE2</b> | <b>GOD 3</b> | <b>VG 3</b> | <b>SE3</b> |
| B         | 12           | 1.05695     | 1.38772    | 27           | 2.18494     | 3.23428    |              |             |            |
| F         | 14           | 0.04329     | 0.2617     | 32           | 0.2201      | 0.48058    | 57           | 0.23385     | 0.47953    |
| H         | 14           | 2.91159     | 2.62771    | 30           | 0.17802     | 1.02716    |              |             |            |
| I         | 12           | 0           | 0.45979    | 28           | 0.2054      | 0.28981    |              |             |            |
| J         | 18           | 1.94543     | 3.68016    | 36           | 0           | 0.07784    |              |             |            |
| K         | 13           | 0           | 0.12012    | 29           | 0.2934      | 0.45727    | 66           | 0           | 0.04555    |
| M         | 12           | 0           | 0.29046    | 27           | 0.48353     | 1.74699    |              |             |            |

---
