# Supplementary material
Source: PubMed Central journal article supplement (PMC3567742)
Supplement: b758e5b07c39330678bf8c7787b195e0_genetics.112.146571-4.pdf [file b758e5b07c39330678bf8c7787b195e0_genetics.112.146571-4.pdf]

**Table S1 Trait-specific means and two standard errors for control genotypes from each of the two populations (Klamath and Marie) for each of the three phenotypic assays.**

| Klamath    |        |       |        |       |        |       |
|------------|--------|-------|--------|-------|--------|-------|
| <b>SM</b>  | Mean 1 | 2SE1  | Mean 2 | 2SE2  | Mean 3 | 2SE3  |
| G          | 2.23   | 0.06  | 2.42   | 0.06  | 2.25   | 0.05  |
| I          | 2.05   | 0.08  | 2.36   | 0.04  | 2.15   | 0.06  |
| K          | 1.83   | 0.06  | 2.32   | 0.06  | 1.95   | 0.06  |
| <b>CL1</b> | Mean 1 | 2SE1  | Mean 2 | 2SE2  | Mean 3 | 2SE3  |
| G          | 3.79   | 1.58  | 6.53   | 1.16  | 4.16   | 0.88  |
| I          | 2.92   | 1.42  | 3.47   | 1.06  | 1.73   | 0.8   |
| K          | 3.5    | 1.26  | 6.61   | 1.52  | 0.73   | 0.54  |
| <b>CL2</b> | Mean 1 | 2SE1  | Mean 2 | 2SE2  | Mean 3 | 2SE3  |
| G          | 7.46   | 3.42  | 19     | 2.44  | 10.23  | 1.72  |
| I          | 6.83   | 1.76  | 8.87   | 2.46  | 4.79   | 1.52  |
| K          | 8.76   | 1.88  | 13.67  | 2.12  | 1.33   | 0.98  |
| <b>CL3</b> | Mean 1 | 2SE1  | Mean 2 | 2SE2  | Mean 3 | 2SE3  |
| G          | 13.27  | 4.84  | 20.3   | 2.74  | 10.43  | 1.86  |
| I          | 8.33   | 2.68  | 8.07   | 2.54  | 5.51   | 1.98  |
| K          | 10.61  | 3.24  | 18.11  | 2.78  | 2.79   | 1.22  |
| <b>CL4</b> | Mean 1 | 2SE1  | Mean 2 | 2SE2  | Mean 3 | 2SE3  |
| G          | 15.9   | 4.38  | 24     | 4.48  | 11.17  | 2.72  |
| I          | 8.92   | 3.72  | 11.63  | 3.76  | 7.51   | 2.12  |
| K          | 13.46  | 2.5   | 21.72  | 3.58  | 2.48   | 1.58  |
| <b>AM</b>  | Mean 1 | 2SE1  | Mean 2 | 2SE2  | Mean 3 | 2SE3  |
| G          | 6.07   | 0.66  | 6.17   | 0.42  | 6.91   | 0.4   |
| I          | 6.76   | 0.6   | 6.06   | 0.3   | 6.65   | 0.46  |
| K          | 6.02   | 0.5   | 6.34   | 0.5   | 6.6    | 0.26  |
| Marie      |        |       |        |       |        |       |
| <b>SM</b>  | Mean 1 | 2SE1  | Mean 2 | 2SE2  | Mean 3 | 2SE3  |
| B          | 1.71   | 0.104 | 1.8    | 0.056 | 1.83   | 0.084 |
| K          | 1.89   | 0.076 | 1.93   | 0.056 | 1.9    | 0.108 |
| <b>CL1</b> | Mean 1 | 2SE1  | Mean 2 | 2SE2  | Mean 3 | 2SE3  |
| B          | 3.54   | 1.476 | 0.87   | 0.92  | 1.1    | 1.26  |

|            |        |       |        |      |        |       |
|------------|--------|-------|--------|------|--------|-------|
| K          | 4.93   | 1.48  | 4.7    | 2.12 | 1.39   | 0.96  |
| <b>CL2</b> | Mean 1 | 2SE1  | Mean 2 | 2SE2 | Mean 3 | 2SE3  |
| B          | 4.46   | 2.424 | 1.95   | 1.8  | 3.5    | 3     |
| K          | 11.71  | 4.76  | 11.23  | 4.24 | 4.96   | 3.2   |
| <b>CL3</b> | Mean 1 | 2SE1  | Mean 2 | 2SE2 | Mean 3 | 2SE3  |
| B          | 6.92   | 3.152 | 1.86   | 1.92 | 4.13   | 2.96  |
| K          | 16.93  | 5.24  | 12.7   | 5.36 | 6.46   | 3.8   |
| <b>CL4</b> | Mean 1 | 2SE1  | Mean 2 | 2SE2 | Mean 3 | 2SE3  |
| B          | 7.15   | 3.84  | 1.84   | 1.48 | 7.33   | 4.48  |
| K          | 16.21  | 6.8   | 11.31  | 5.6  | 6.53   | 3.88  |
| <b>AM</b>  | Mean 1 | 2SE1  | Mean 2 | 2SE2 | Mean 3 | 2SE3  |
| B          | 6.66   | 1.572 | 6.35   | 0.56 | 6.91   | 0.576 |
| K          | 6.13   | 0.96  | 6.46   | 0.76 | 6.92   | 1.16  |

---
